# Supplementary material
Source: publisher figshare collection journal article supplement (https://tandf.figshare.com/articles/dataset/_/12911170)
Supplement: Supplementary file 1 [file 24560869]

# 1 SUPPLEMENTARY MATERIAL

## 2 Two new homoisoflavones from *Portulaca oleracea* L. and their activities

3 Yang Duan <sup>a,†</sup>, Zheming Ying <sup>b,†</sup>, Mingbo Zhang <sup>a</sup>, Xixiang Ying <sup>a,\*</sup>, Guanlin Yang <sup>b</sup>,

4 \*

5 <sup>a</sup>School of Pharmacy, Liaoning University of Traditional Chinese Medicine, Dalian,  
6 P.R. China

7 <sup>b</sup>School of The First Clinic, Liaoning University of Traditional Chinese Medicine,  
8 Shenyang, Liaoning, P.R. China

9 E-mail address in order:

10 duanyang39@163.com, yingzheming1994@163.com, [mbzhang@126.com](mailto:mbzhang@126.com),

11 yingxixiang@163.com and yang\_guanlin@163.com

12 \*Correspondence author: Prof. Xixiang Ying, School of Pharmacy, Liaoning  
13 University of Traditional Chinese Medicine, No. 77, Shengming 1 Road, DD Port,  
14 Dalian, 116600, P.R. China, Tel: +86-0411-85890139, Fax: +86-0411-85890128,  
15 yingxixiang@163.com

16 \*Correspondence author: Prof. Guanlin Yang, School of The First Clinic, Liaoning  
17 University of Traditional Chinese Medicine, Shenyang, Liaoning, 110032, P.R. China,  
18 yang\_guanlin@163.com

19 <sup>†</sup>Yang Duan and Zheming Ying contributed equally to this work.

20

### 21 Abstract

22 Two new compounds, identified as  
23 3-(2-hydroxybenzyl)-6,8-dimethoxy-4H-chromen-4-one (**1**), named oleracone J and  
24 3-(2-hydroxybenzyl)-6,8-dimethoxychroman-4-one (**2**), named oleracone K, were  
25 isolated from *Portulaca oleracea* L., and the structures of them were determined by

26 spectroscopy, including one- and two-dimensional nuclear magnetic resonance,  
27 high-resolution electrospray ionization time-of-flight mass spectrometry. The two  
28 compounds have scavenging activities in 1,1-diphenyl-2-picryl-hydrazyl (DPPH)  
29 radical quenching assay, with IC<sub>50</sub> values of 18.34, 23.92 μM, and anticholinesterase  
30 activities with IC<sub>50</sub> values of 59.08, 67.89 μM, respectively.

31 **Keywords:** *Portulaca oleracea* L.; homoisoflavone; antioxidant activity;  
32 anticholinesterase activity

33

### 34 **Supporting information**

35 Supplementary material relating to this article is available online, alongside Tables  
36 S1-S3 and Figure S1-S23.

37 Table S1. Full NMR data for oleracone J (**1**) in CDCl<sub>3</sub>

38 Table S2. Full NMR data for oleracone K (**2**) in CDCl<sub>3</sub>

39 Table S3. IC<sub>50</sub> (μM) for antioxidant and acetylcholinesterase activities of compounds  
40 **1** and **2** (*n* = 5)

41 Figure S1. Key HMBC correlations of oleracone J (**1**)

42 Figure S2. Key <sup>1</sup>H-<sup>1</sup>H COSY and ROESY correlations of oleracone J (**1**)

43 Figure S3. Key HMBC correlations of oleracone K (**2**)

44 Figure S4. Key <sup>1</sup>H-<sup>1</sup>H COSY and ROESY correlations of oleracone K (**2**)

45 Figure S5. <sup>1</sup>H NMR (600 MHz) spectrum of oleracone J (**1**) in CDCl<sub>3</sub>

46 Figure S6. <sup>13</sup>C NMR (150 MHz) spectrum of oleracone J (**1**) in CDCl<sub>3</sub>

47 Figure S7. DEPT spectrum of oleracone J (**1**) in CDCl<sub>3</sub>

48 Figure S8. HSQC spectrum of oleracone J (**1**) in CDCl<sub>3</sub>

49 Figure S9. HMBC spectrum of oleracone J (**1**) in CDCl<sub>3</sub>

50 Figure S10. <sup>1</sup>H-<sup>1</sup>H COSY spectrum of oleracone J (**1**) in CDCl<sub>3</sub>

51 Figure S11. ROESY spectrum of oleracone J (**1**) in CDCl<sub>3</sub>

52 Figure S12. UHPLC-ESI-Q-TOF/MS of oleracone J (**1**)

53 Figure S13. <sup>1</sup>H NMR (600 MHz) spectrum of oleracone K (**2**) in CDCl<sub>3</sub>

54 Figure S14. <sup>13</sup>C NMR (150 MHz) spectrum of oleracone K (**2**) in CDCl<sub>3</sub>

55 Figure S15. DEPT spectrum of oleracone K (**2**) in CDCl<sub>3</sub>

56 Figure S16. HSQC spectrum of oleracone K (**2**) in CDCl<sub>3</sub>

57 Figure S17. HMBC spectrum of oleracone K (**2**) in CDCl<sub>3</sub>

58 Figure S18. <sup>1</sup>H-<sup>1</sup>H COSY spectrum of oleracone K (**2**) in CDCl<sub>3</sub>

59 Figure S19. ROESY spectrum of oleracone K (**2**) in CDCl<sub>3</sub>

60 Figure S20. UHPLC-ESI-Q-TOF/MS of oleracone K (**2**)

61 Figure S21. DPPH radical scavenging activities of compounds **1-2** and BHA (*n* = 5)

62 Figure S22. Anticholinesterase effect of compounds **1-2** and Eserine (*n* = 5)

63 Figure S23. Compounds **1-2** binding mode to AChE

64

65

66

67

68

69

70

71

72

73

74

75

76 Table S1. Full NMR data for oleracone J (**1**) in CDCl<sub>3</sub>

| Position | $\delta_C$ | Type            | $\delta_H$ , mult (J in Hz) | $^1H$ - $^1H$ COSY | HMBC                | ROESY      |
|----------|------------|-----------------|-----------------------------|--------------------|---------------------|------------|
| 1        |            | O               |                             |                    |                     |            |
| 2        | 151.1      | CH              | 7.87 s                      | 9                  | 3, 4, 8a, 9         | 9          |
| 3        | 125.5      | C               |                             |                    |                     |            |
| 4        | 178.7      | C               |                             |                    |                     |            |
| 4a       | 108.9      | C               |                             |                    |                     |            |
| 5        | 92.6       | CH              | 6.42 d (2.2)                | 7                  | 4, 4a, 6, 7, 8a     | 6-OMe, 7   |
| 6        | 164.8      | C               |                             |                    |                     |            |
| 6-OMe    | 56.3       | CH <sub>3</sub> | 3.88 s                      |                    | 6                   | 5          |
| 7        | 96.6       | CH              | 6.35 d (2.2)                | 5, 8-OMe           | 4a, 5, 6, 8         | 5, 8-OMe   |
| 8        | 161.3      | C               |                             |                    |                     |            |
| 8-OMe    | 56.6       | CH <sub>3</sub> | 3.93 s                      | 7                  | 8                   | 7          |
| 8a       | 160.7      | C               |                             |                    |                     |            |
| 9        | 27.5       | CH <sub>2</sub> | 3.66 s                      | 2, 6'              | 2, 3, 4, 1', 2', 6' | 2, 6'      |
| 1'       | 126.2      | C               |                             |                    |                     |            |
| 2'       | 155.4      | C               |                             |                    |                     |            |
| 2'-OH    |            |                 | 8.23 brs                    |                    |                     |            |
| 3'       | 118.7      | CH              | 6.94 dd (8.1, 14.1)         | 4'                 | 1', 2', 5'          | 4'         |
| 4'       | 128.6      | CH              | 7.12 m                      | 3', 5', 6'         | 2', 3', 5', 6'      | 3', 5', 6' |
| 5'       | 120.3      | CH              | 6.82 t (7.1)                | 4', 6'             | 1', 3', 4', 6'      | 4', 6'     |
| 6'       | 130.2      | CH              | 7.10 m                      | 9, 4', 5'          | 9, 1', 2', 4', 5'   | 9, 4', 5'  |

77

78

79

80

81

82

83

84

85

86

87

88 Table S2. Full NMR data for oleracone K (**2**) in CDCl<sub>3</sub>

| Position | $\delta_C$ | Type            | $\delta_H$ , mult (J in Hz)                | <sup>1</sup> H- <sup>1</sup> H COSY | HMBC                                       | ROESY                              |
|----------|------------|-----------------|--------------------------------------------|-------------------------------------|--------------------------------------------|------------------------------------|
| 1        |            | O               |                                            |                                     |                                            |                                    |
| 2        | 70.5       | CH <sub>2</sub> | a: 4.17 t (11.2)<br>b: 4.53 dd (4.9, 11.2) | 2b, 3, 9a, 9b<br>2a, 3, 9b          | 3, 4, 8a, 9<br>3, 4, 8a, 9                 | 2b, 3, 9a, 9b<br>2a, 3, 9a, 9b     |
| 3        | 47.8       | CH              | 3.04 m                                     | 2a, 2b, 9a, 9b                      | 2, 4, 9, 1'                                | 2a, 2b, 9a, 9b                     |
| 4        | 194.1      | C               |                                            |                                     |                                            |                                    |
| 4a       | 105.5      | C               |                                            |                                     |                                            |                                    |
| 5        | 93.4       | CH              | 6.05 q (2.3, 3.7)                          | 7                                   | 4, 4a, 6, 7, 8a                            | 6-OMe, 7                           |
| 6        | 166.7      | C               |                                            |                                     |                                            |                                    |
| 6-OMe    | 55.8       | CH <sub>3</sub> | 3.83 s                                     |                                     | 6                                          | 5                                  |
| 7        | 93.1       | CH              | 6.05 q (2.3, 3.7)                          | 5, 8-OMe                            | 5, 6, 8, 8a                                | 5, 8-OMe                           |
| 8        | 162.8      | C               |                                            |                                     |                                            |                                    |
| 8-OMe    | 56.0       | CH <sub>3</sub> | 3.88 s                                     | 7                                   | 8                                          | 7                                  |
| 8a       | 165.6      | C               |                                            |                                     |                                            |                                    |
| 9        | 26.9       | CH <sub>2</sub> | a: 2.79 q (6.6, 16.7)<br>b: 3.06 m         | 2a, 3, 9b<br>2a, 2b, 3, 9a          | 2, 3, 4, 1', 2', 6'<br>2, 3, 4, 1', 2', 6' | 2a, 2b, 3, 9b, 6'<br>2a, 2b, 3, 9a |
| 1'       | 125.2      | C               |                                            |                                     |                                            |                                    |
| 2'       | 155.1      | C               |                                            |                                     |                                            |                                    |
| 2'-OH    |            |                 | 9.65 brs                                   |                                     |                                            |                                    |
| 3'       | 117.8      | CH              | 6.94 dd (8.1, 14.1)                        | 4'                                  | 1', 2', 5'                                 | 4'                                 |
| 4'       | 128.6      | CH              | 7.13 m                                     | 3', 5', 6'                          | 2', 3', 5', 6'                             | 3', 5', 6'                         |
| 5'       | 120.4      | CH              | 6.82 t (7.1)                               | 4', 6'                              | 1', 3', 4', 6'                             | 4', 6'                             |
| 6'       | 131.0      | CH              | 7.04 dd (0.9, 7.1)                         | 4', 5'                              | 9, 1', 2', 4'                              | 9a, 4', 5'                         |

89

90 Table S3. IC<sub>50</sub> (μM) for antioxidant and acetylcholinesterase activities of compounds

| Compounds and standard Inhibitors | DPPH IC <sub>50</sub> (μM) | AChE IC <sub>50</sub> (μM) |
|-----------------------------------|----------------------------|----------------------------|
| 1                                 | 18.34 ± 0.03               | 59.08 ± 0.05               |
| 2                                 | 23.92 ± 0.01               | 67.89 ± 0.09               |
| Eserine                           | -                          | 33.26 ± 0.03               |
| BHA                               | 57.41 ± 0.05               | -                          |

91 Eserine and BHA as positive control, and values are expressed as the means ± SD for

92 *n* = 5.

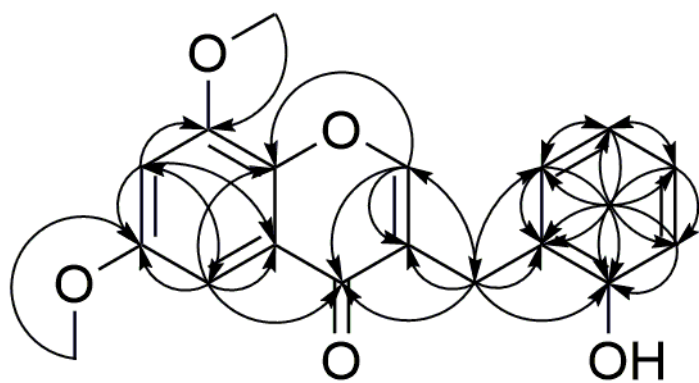

HMBC (H  $\longrightarrow$  C)

Oleracone J (1)

93

94

95 Figure S1. Key HMBC correlations of oleracone J (1)

96

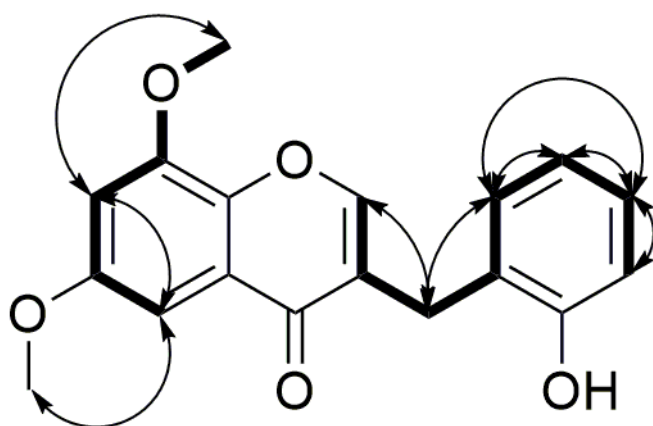

ROESY  $\curvearrowright$

COSY  $\text{—}$

Oleracone J (1)

97

98

99 Figure S2. Key  $^1\text{H}$ - $^1\text{H}$  COSY and ROESY correlations of oleracone J (1)

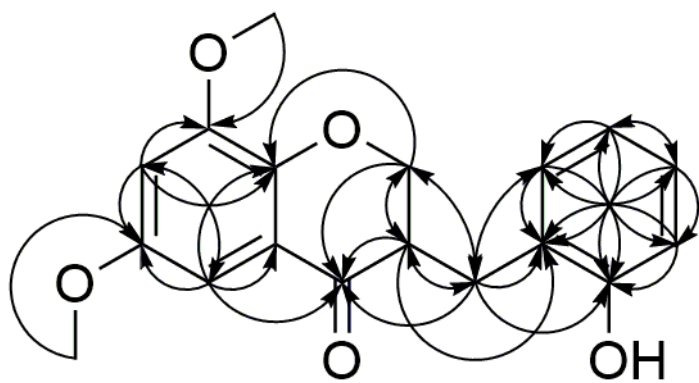

HMBC (H  $\longrightarrow$  C)

Oleracone K (**2**)

100

101

102 Figure S3. Key HMBC correlations of oleracone K (**2**)

103

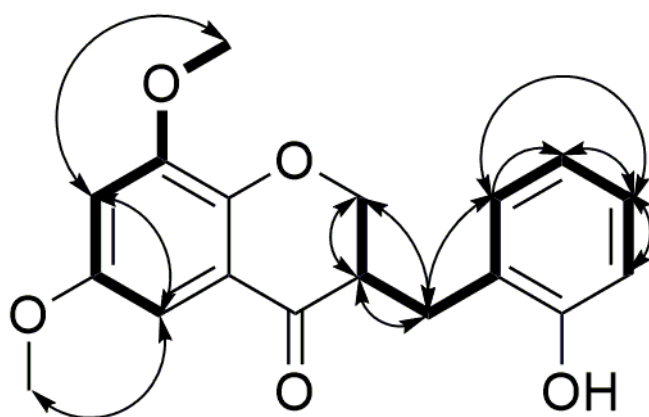

ROESY  $\curvearrowright$

COSY —

Oleracone K (**2**)

104

105

106 Figure S4. Key  $^1\text{H}$ - $^1\text{H}$  COSY and ROESY correlations of oleracone K (**2**)

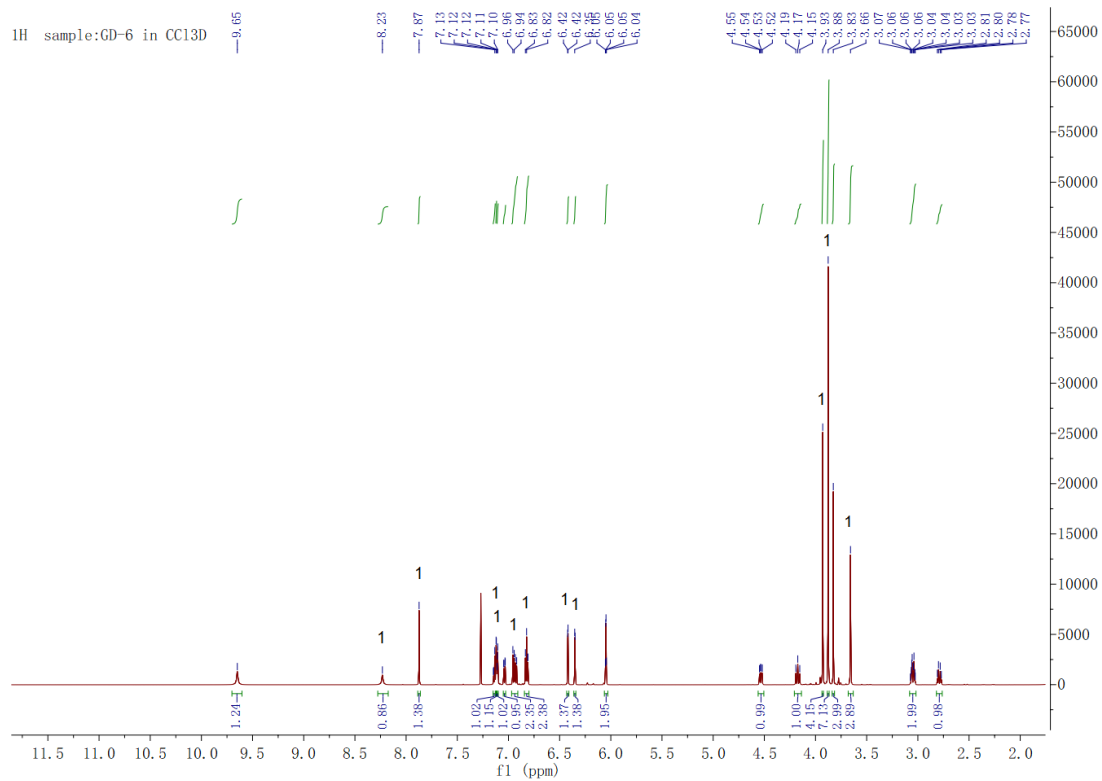

107

108

109 Figure S5. <sup>1</sup>H NMR (600 MHz) spectrum of oleracone J (**1**) in CDCl<sub>3</sub>

110

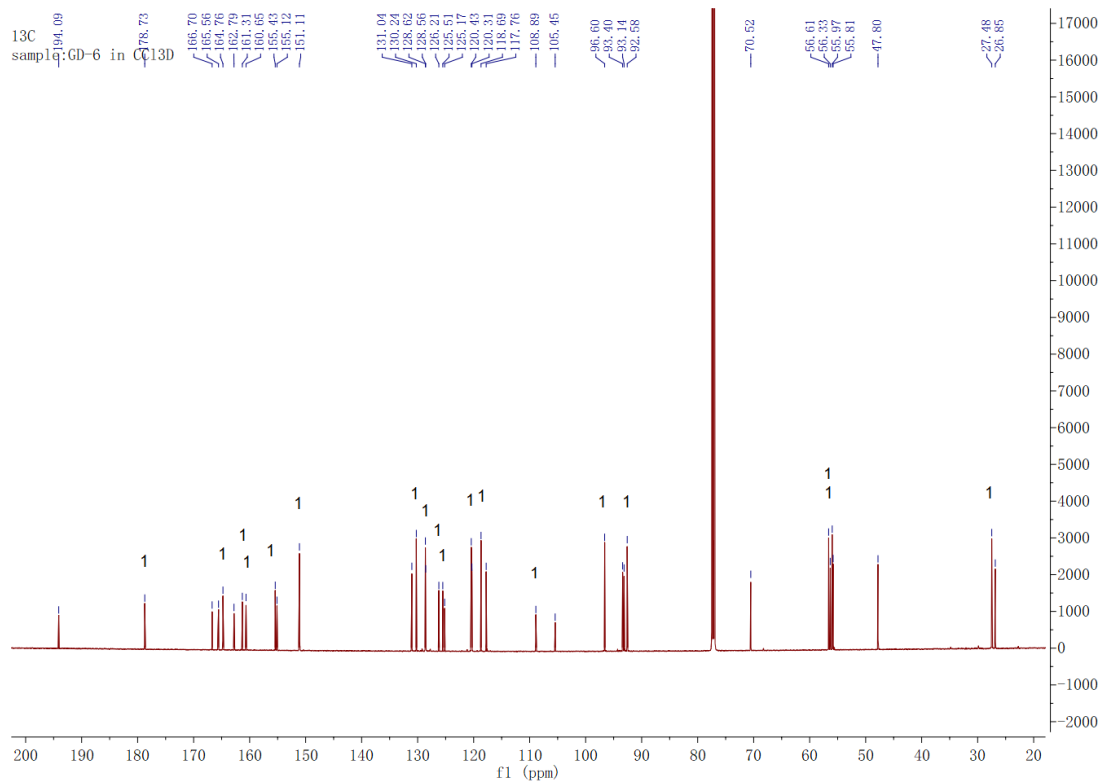

111



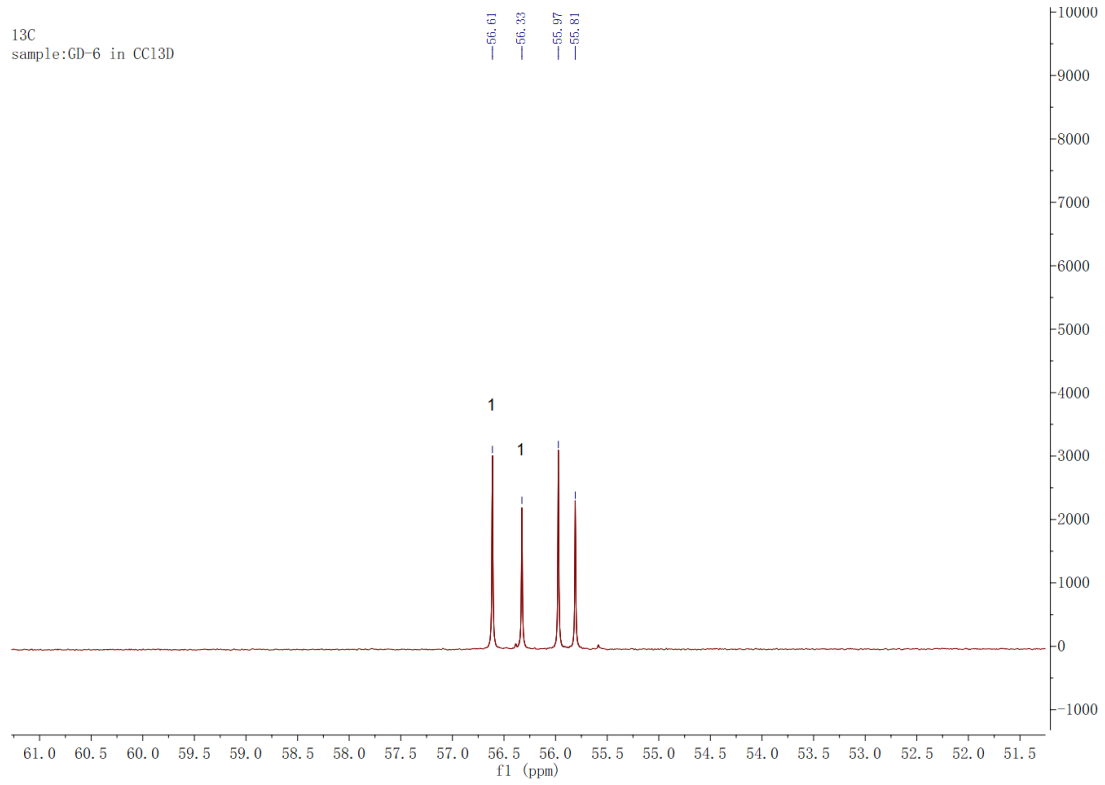

112

113

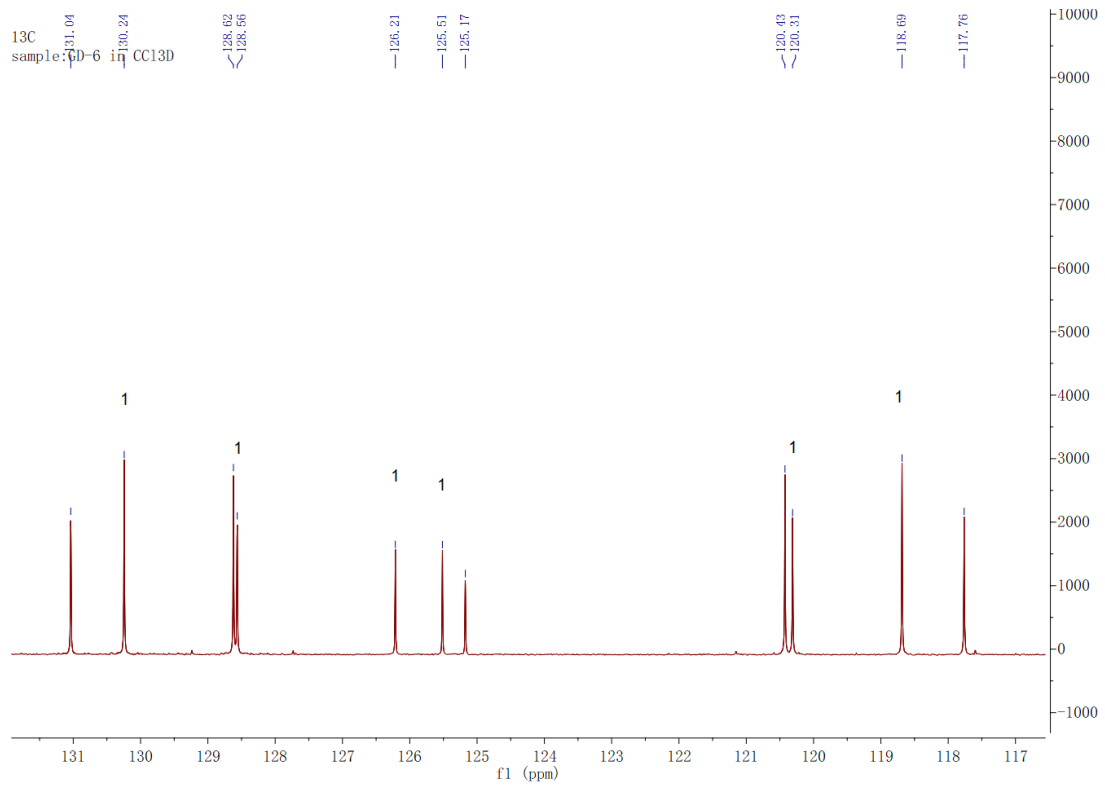

114

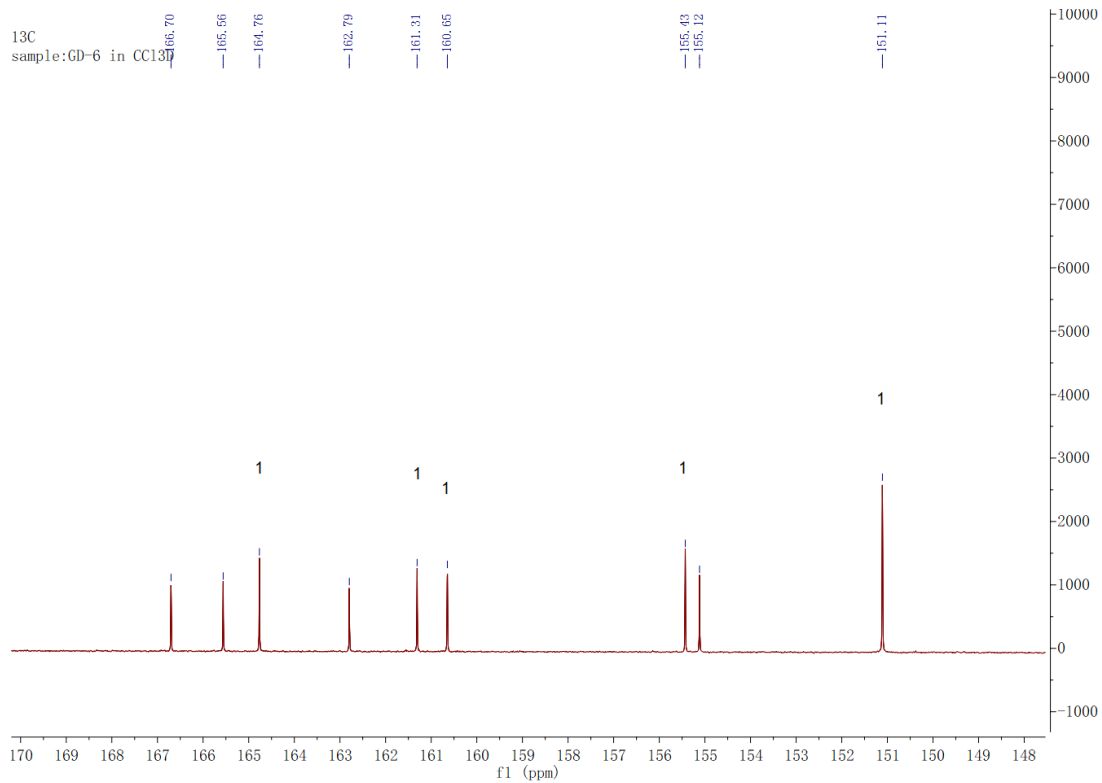

115

116

117 Figure S6. <sup>13</sup>C NMR (150 MHz) spectrum of oleracone J (**1**) in CDCl<sub>3</sub>

118

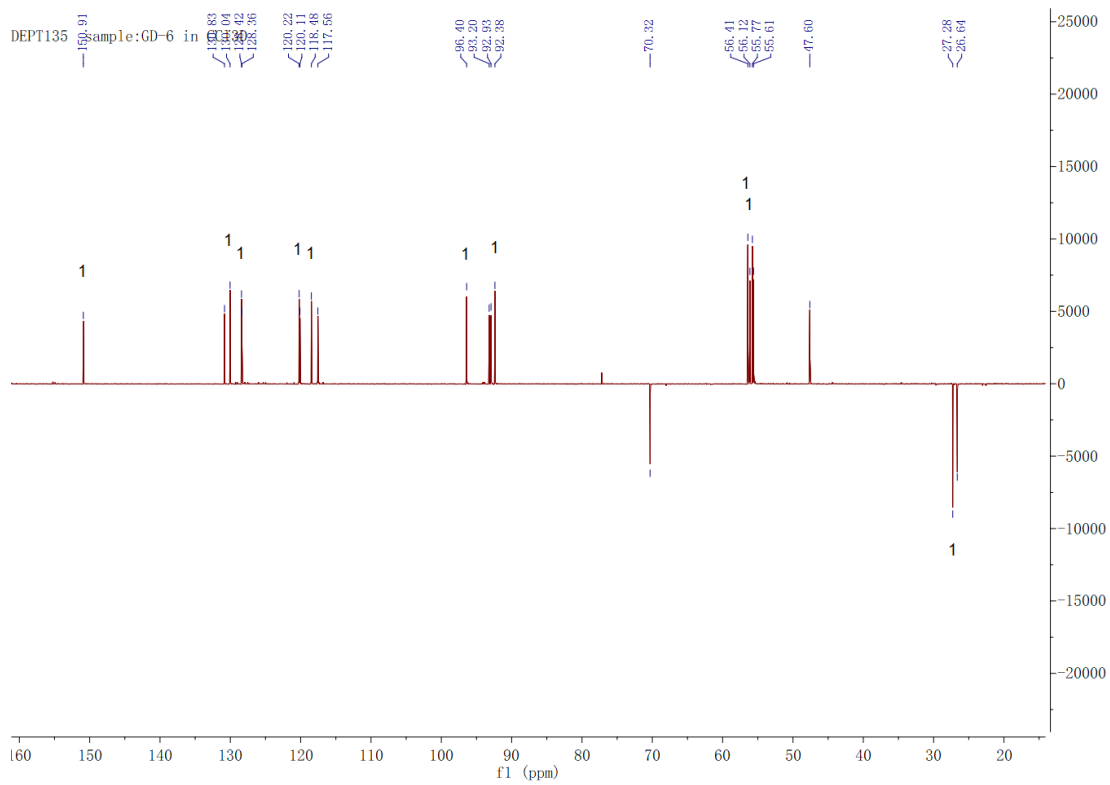

119

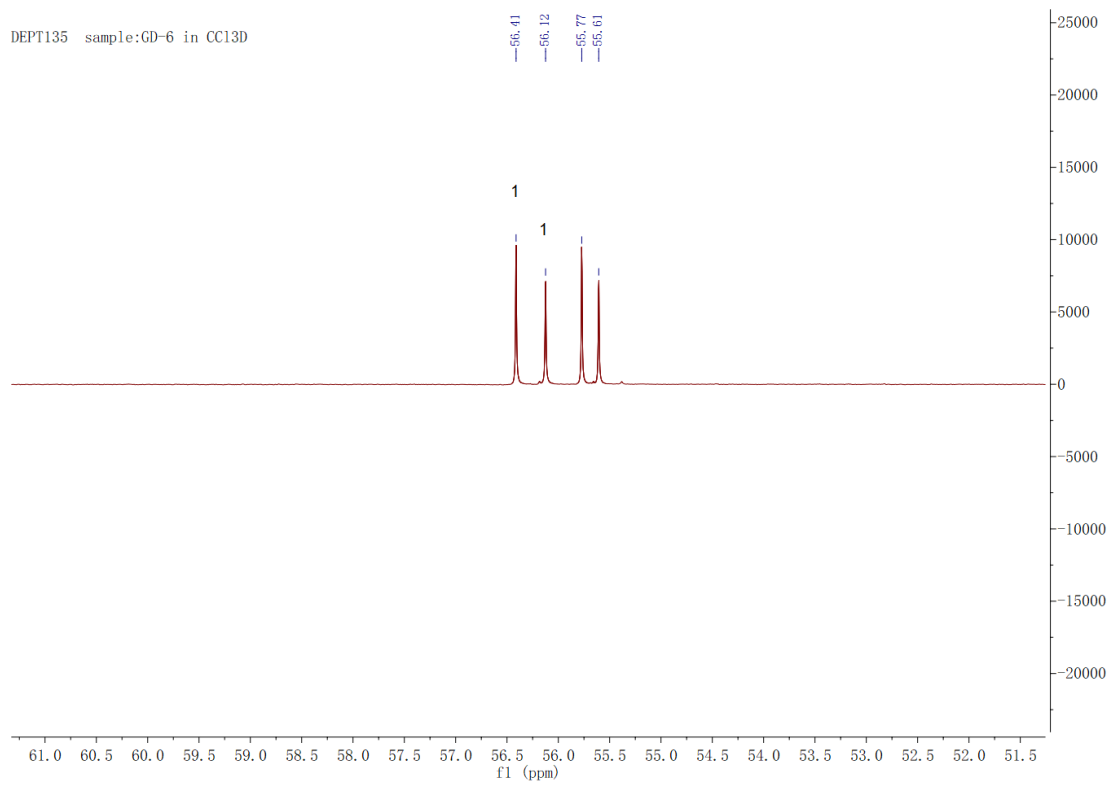

120

121

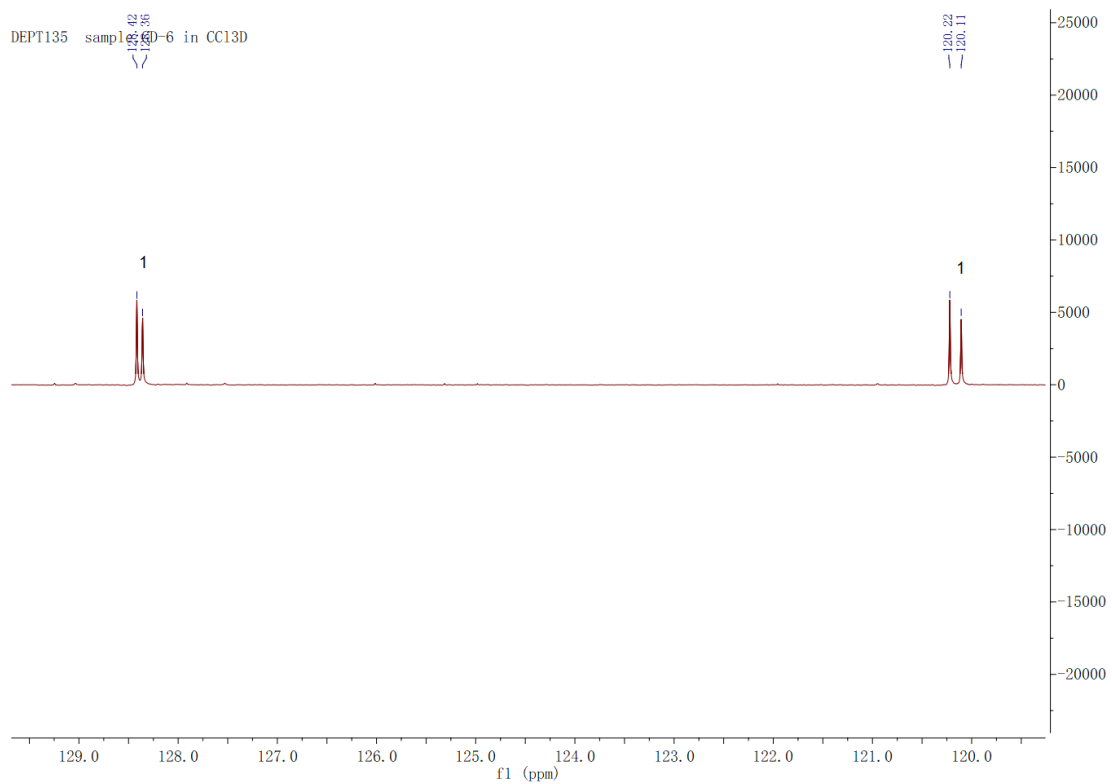

122

123

124 Figure S7. DEPT spectrum of oleracone **J** (**1**) in CDCl<sub>3</sub>

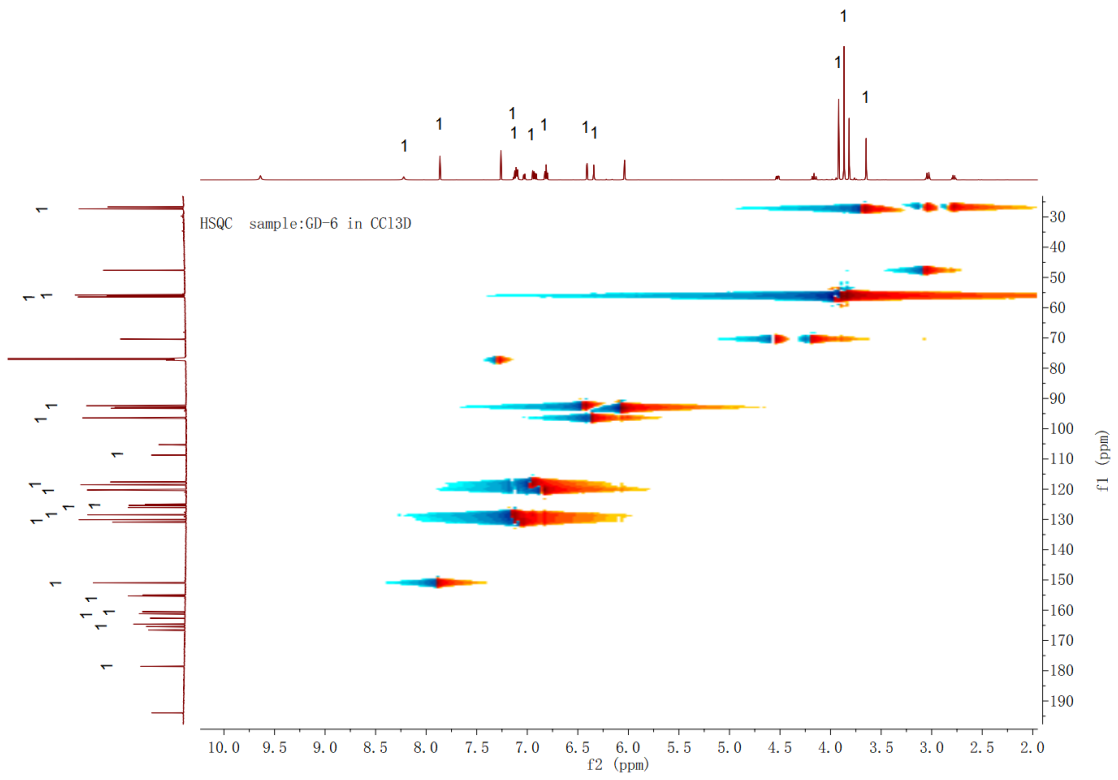

125

126

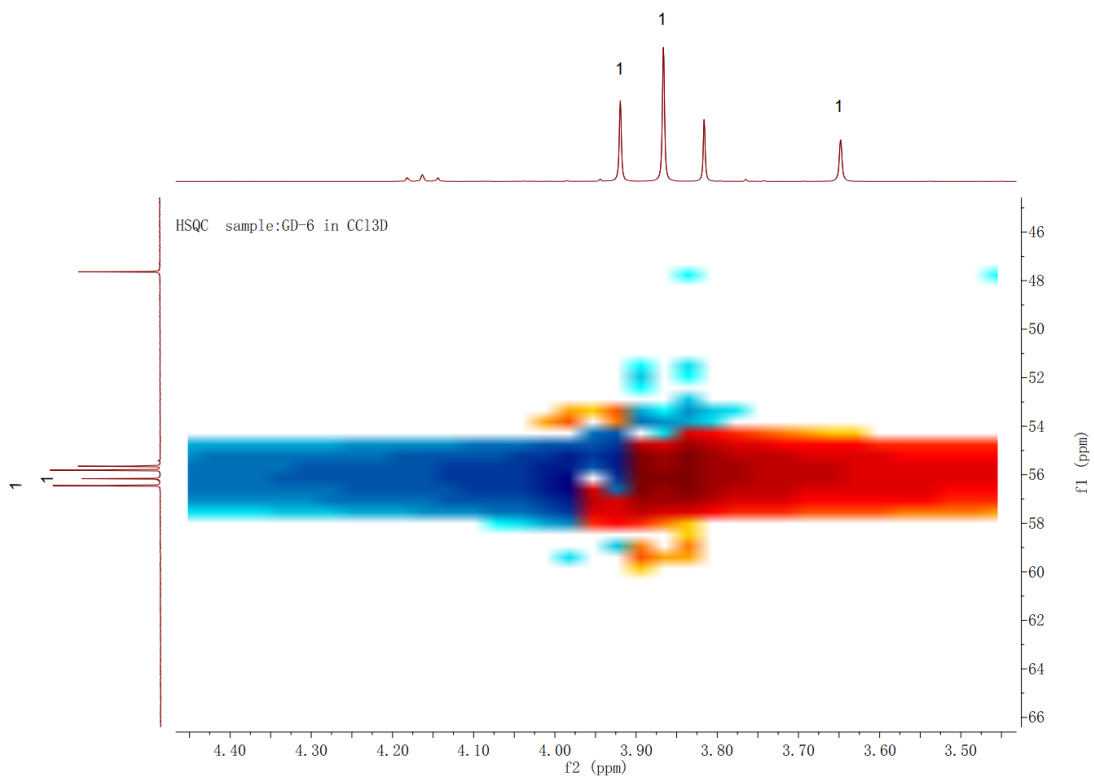

127

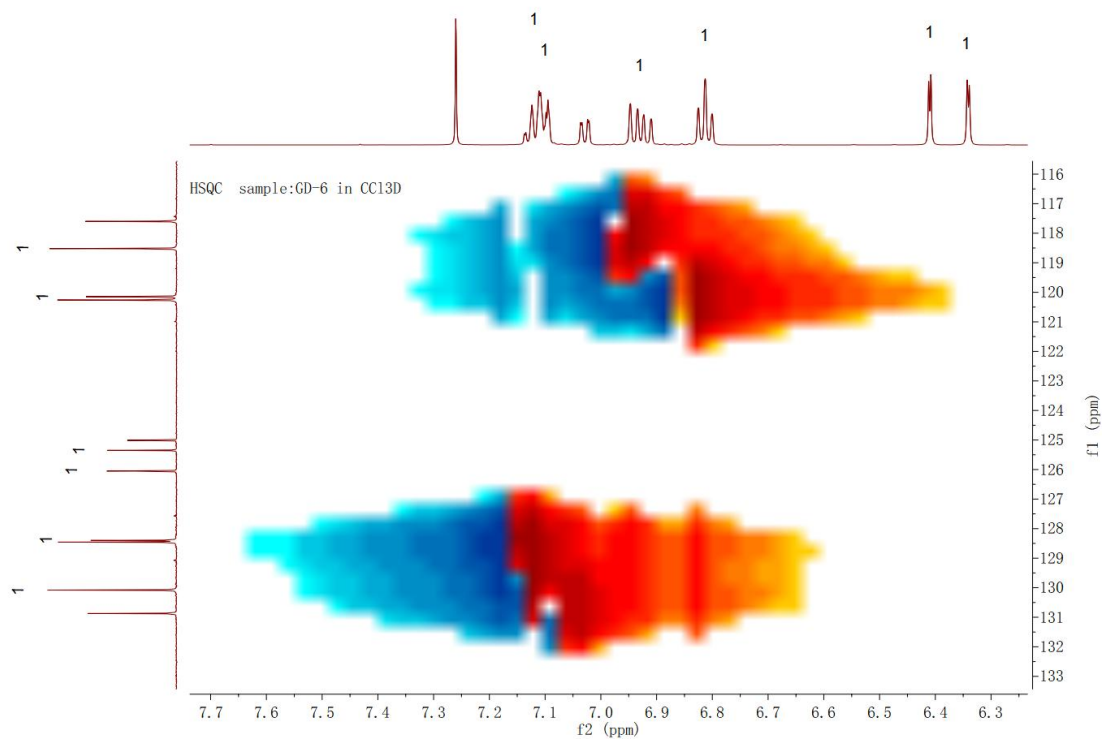

128

129

130 Figure S8. HSQC spectrum of oleracone J (**1**) in CDCl<sub>3</sub>

131

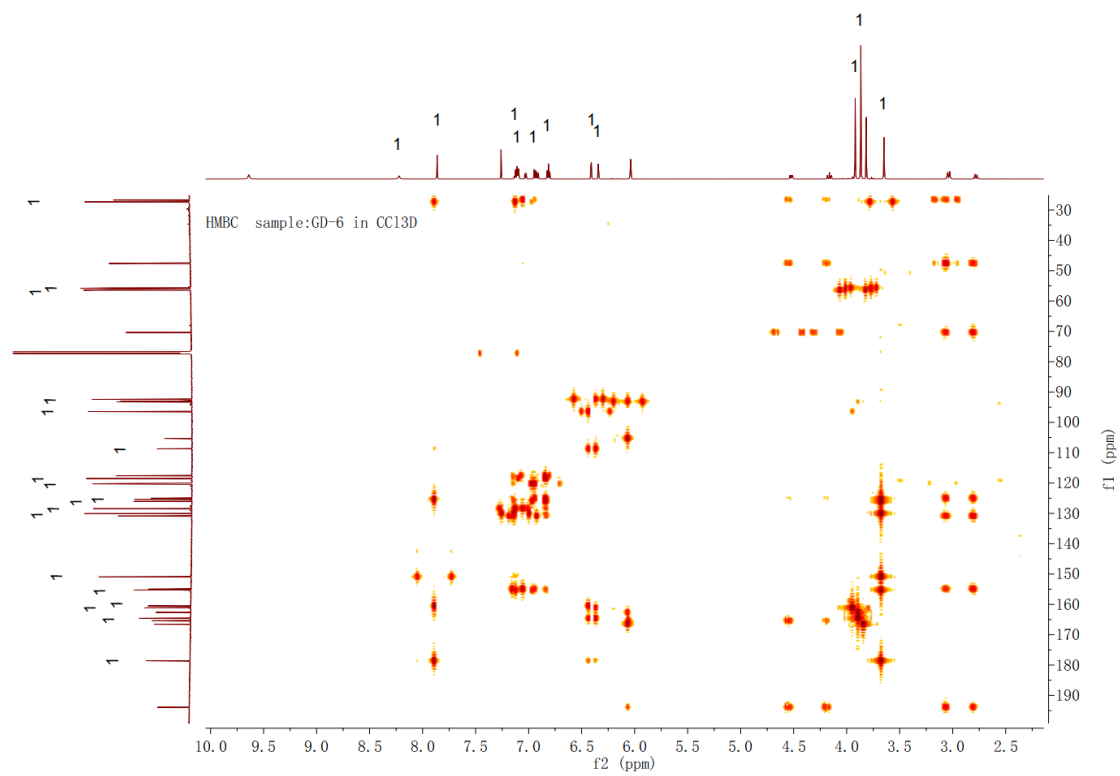

132

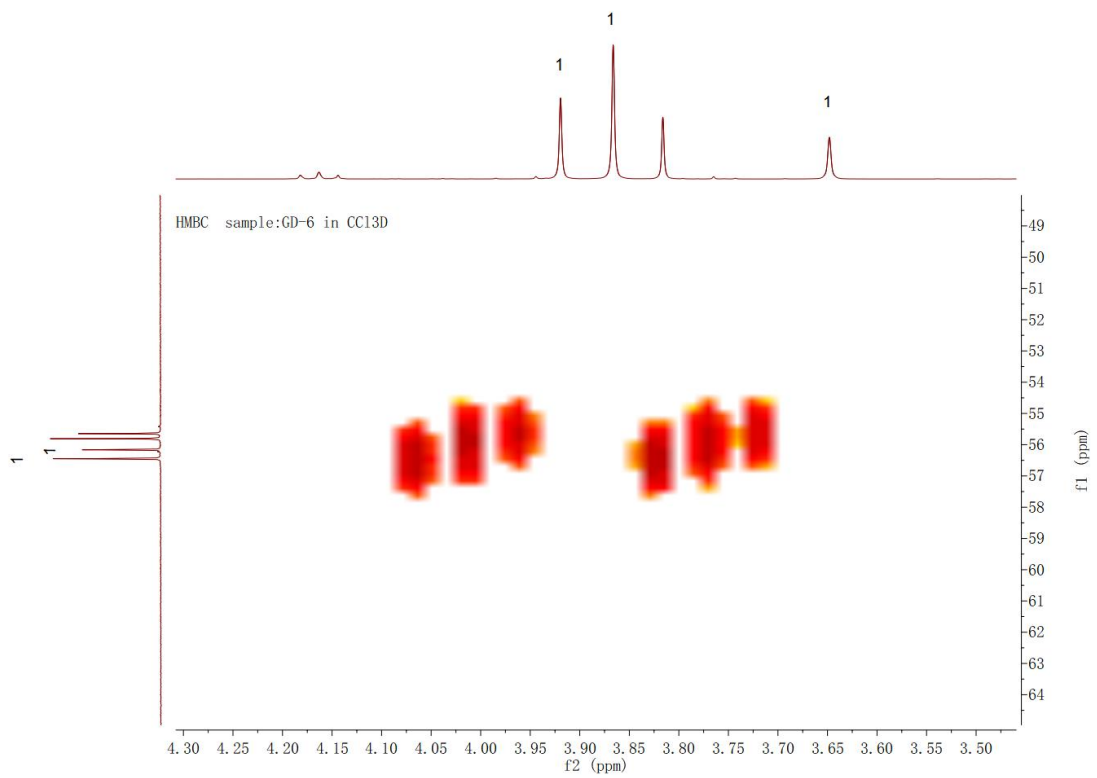

133

134

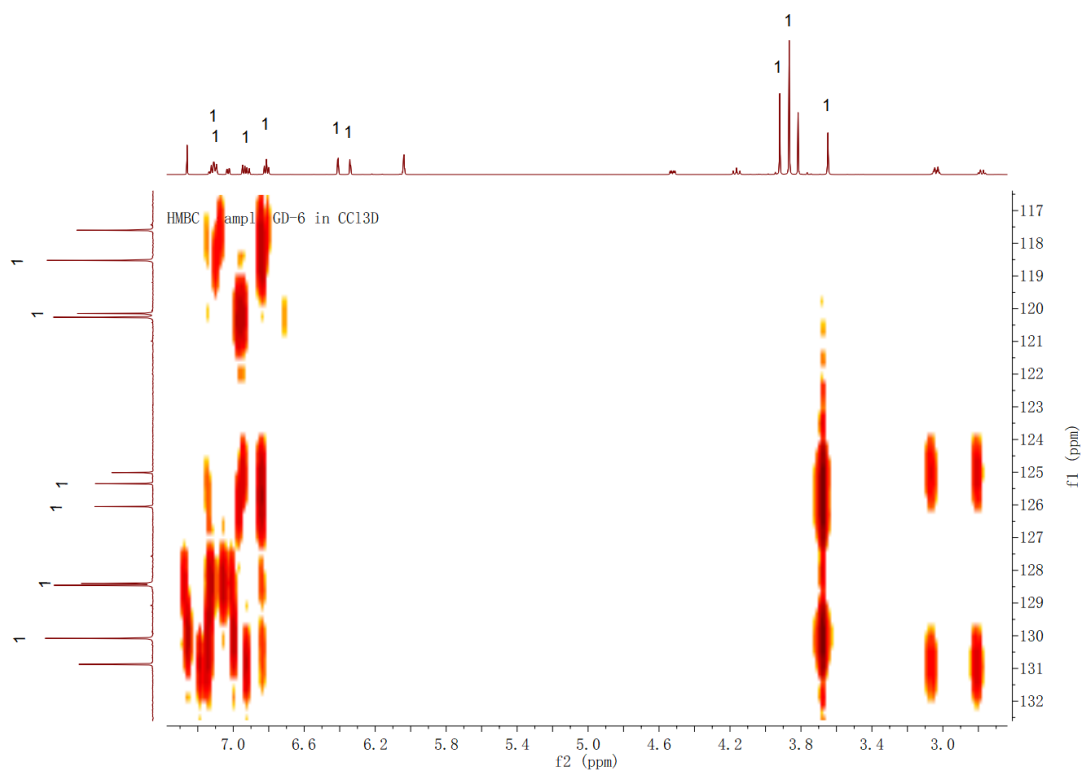

135

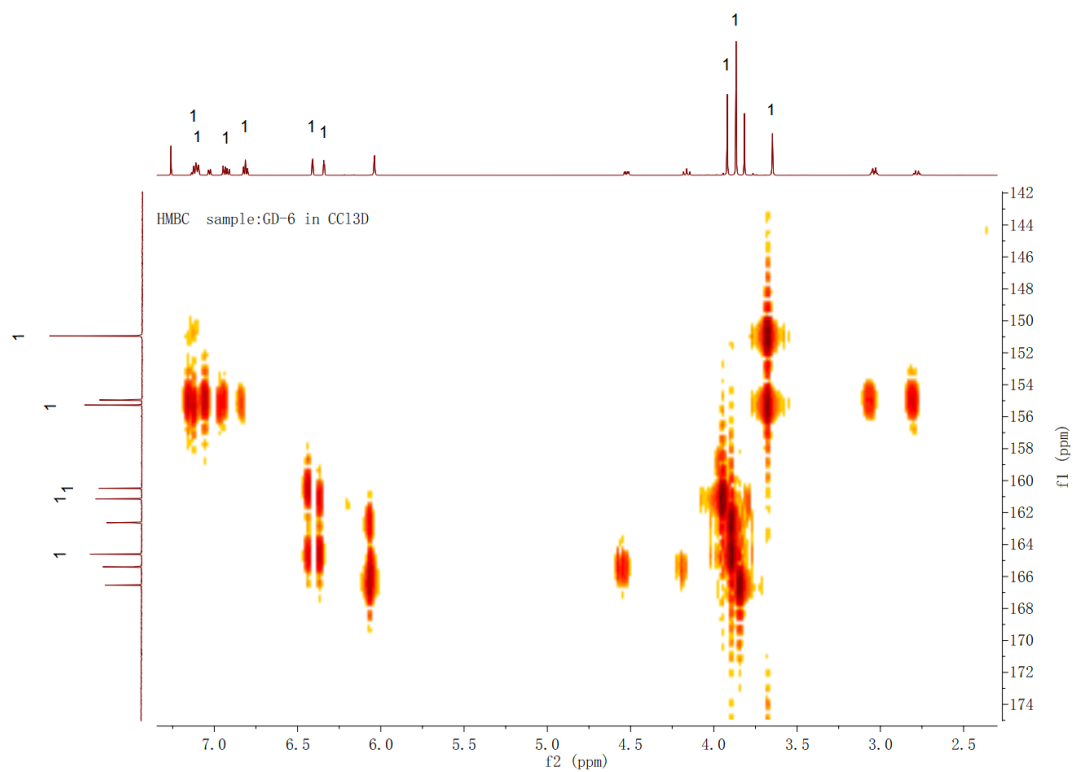

136

137

138 Figure S9. HMBC spectrum of oleracone J (**1**) in CDCl<sub>3</sub>

139

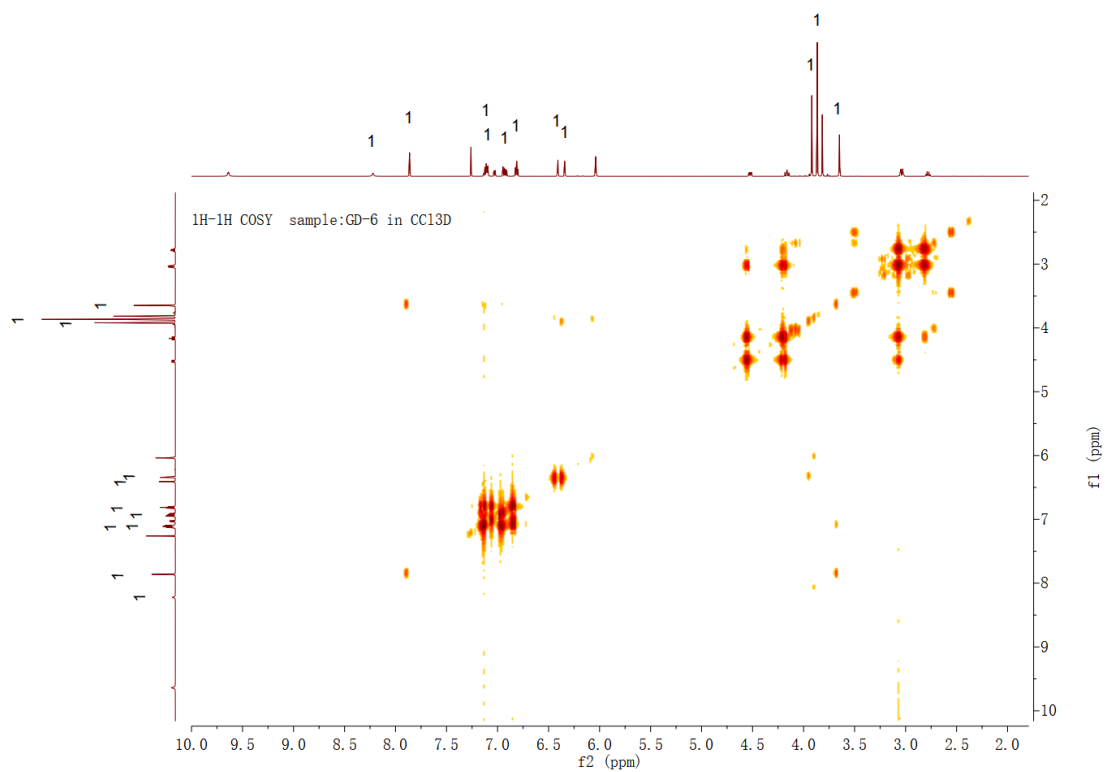

140

141 Figure S10.  $^1\text{H}$ - $^1\text{H}$  COSY spectrum of oleracone J (**1**) in  $\text{CDCl}_3$

142

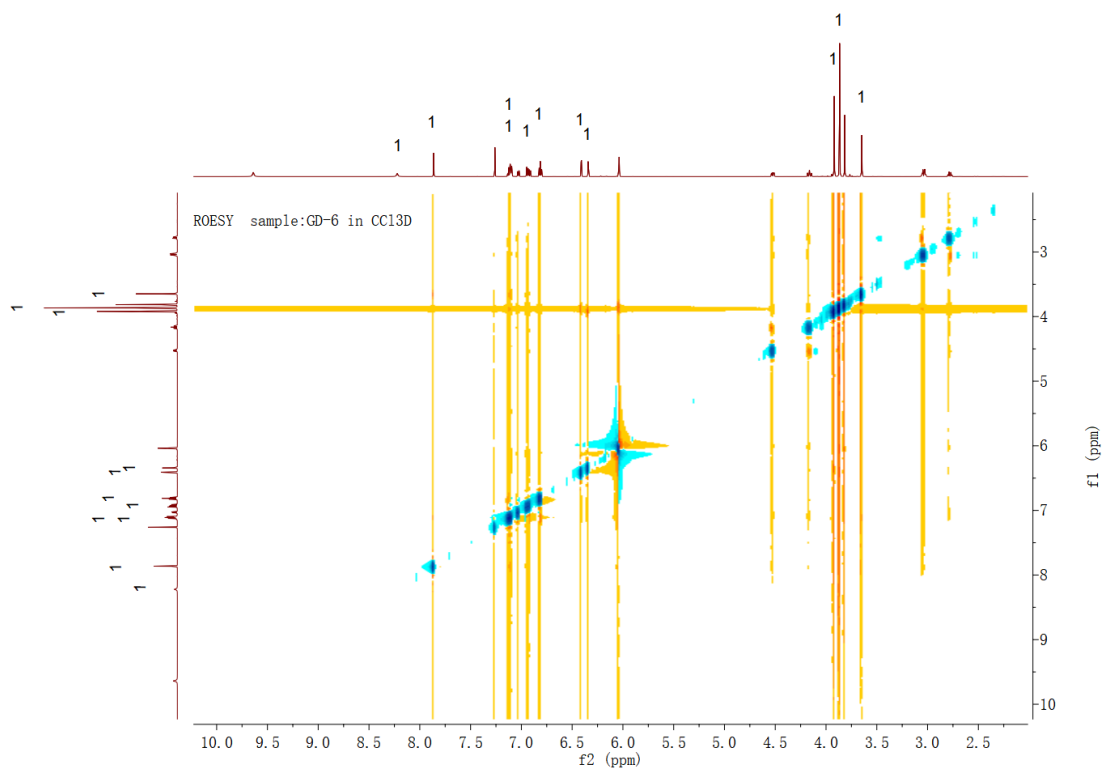

143

144

145 Figure S11. ROESY spectrum of oleracone J (**1**) in  $\text{CDCl}_3$

146

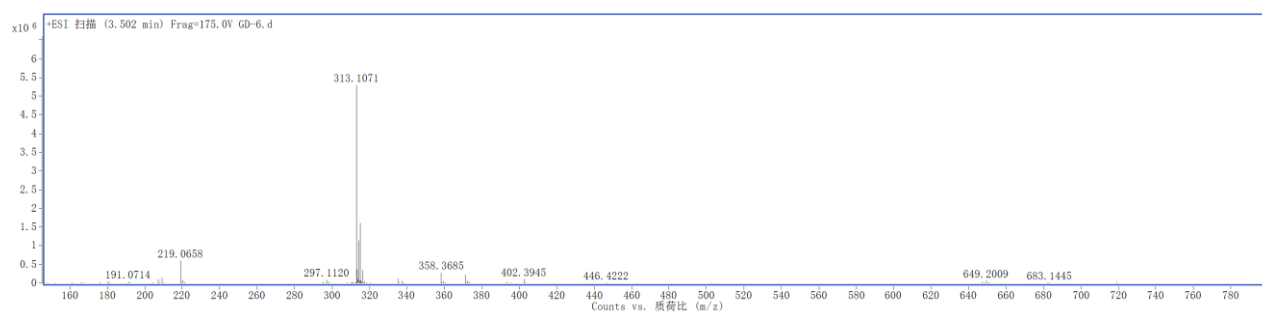

147

148

149 Figure S12. UHPLC-ESI-Q-TOF/MS of oleracone J (**1**)

150





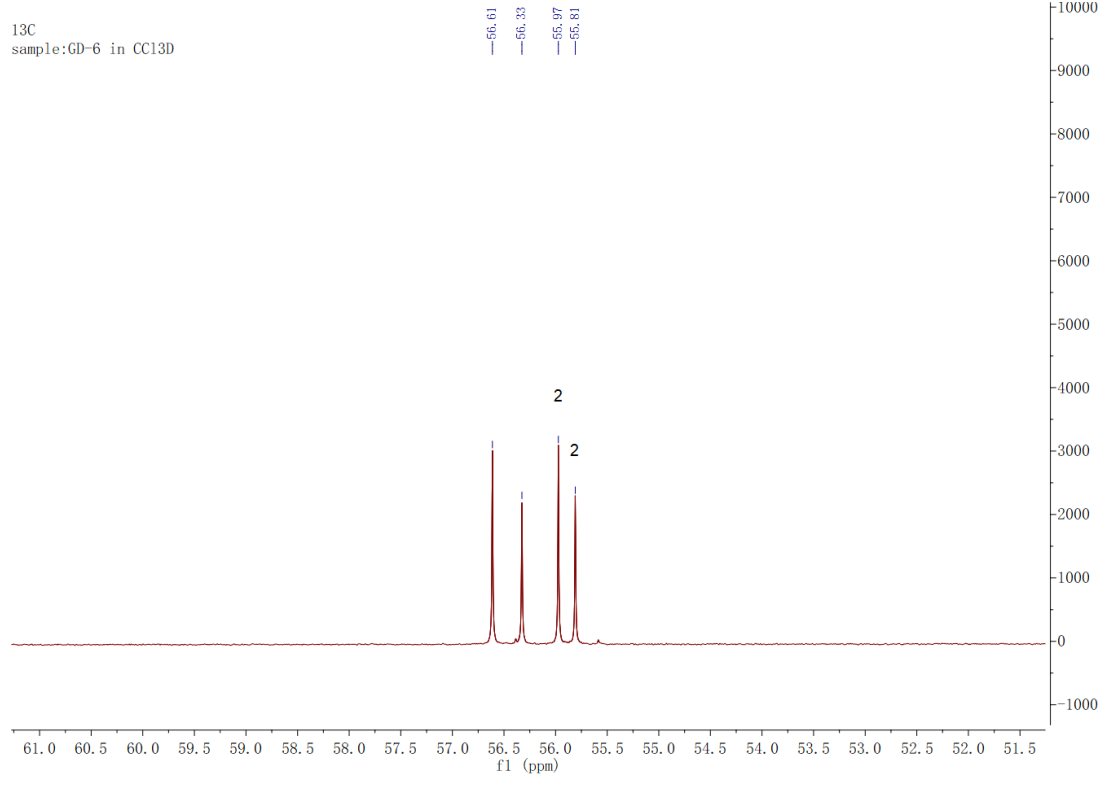

156

157

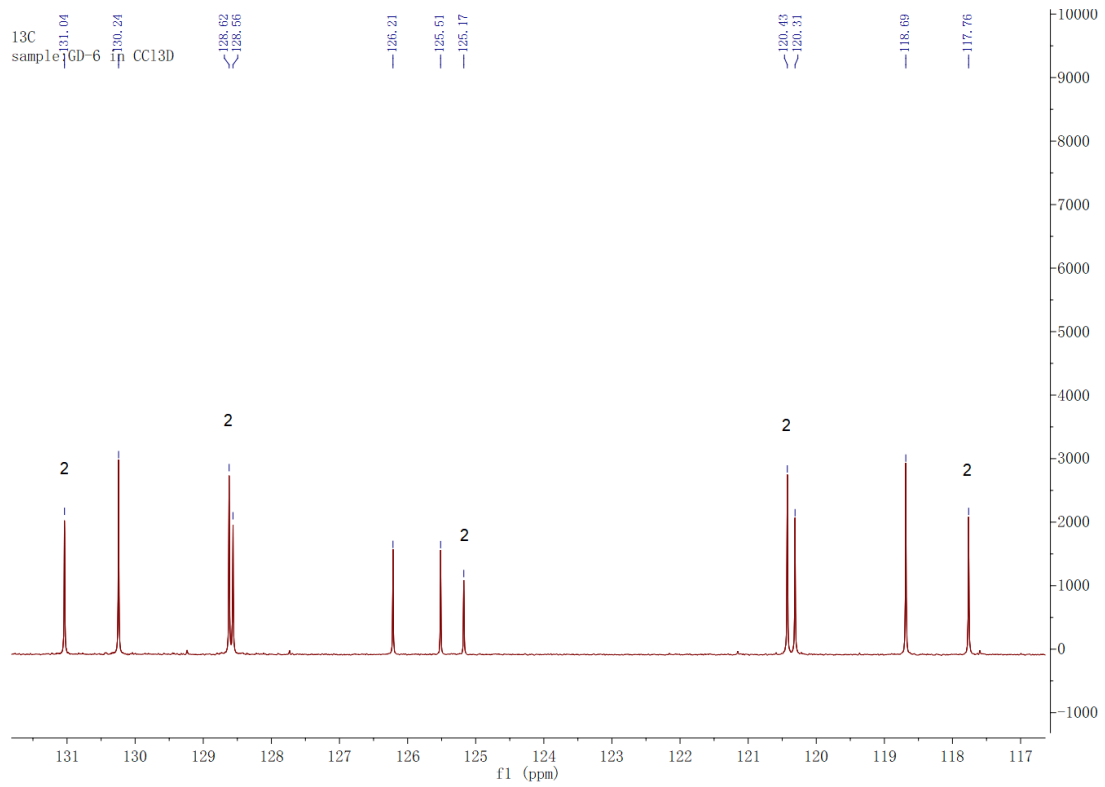

158

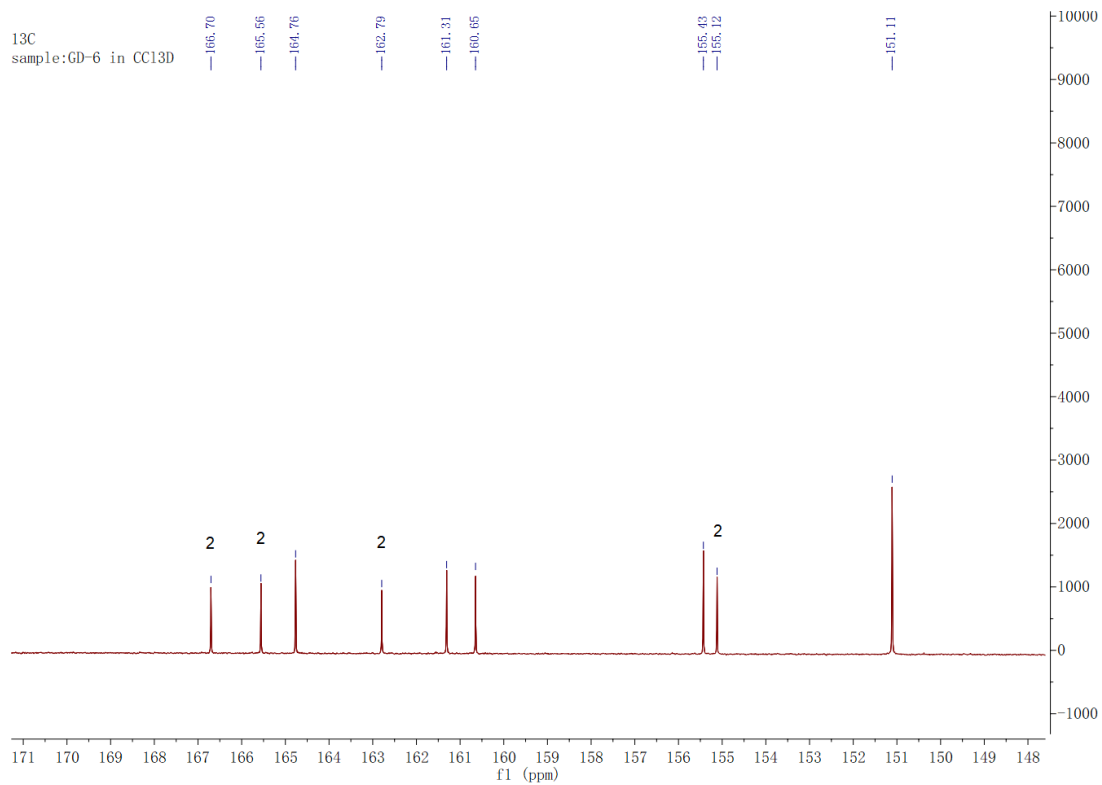

159

160

161 Figure S14.  $^{13}\text{C}$  NMR (150 MHz) spectrum of oleracone K (**2**) in  $\text{CDCl}_3$

162

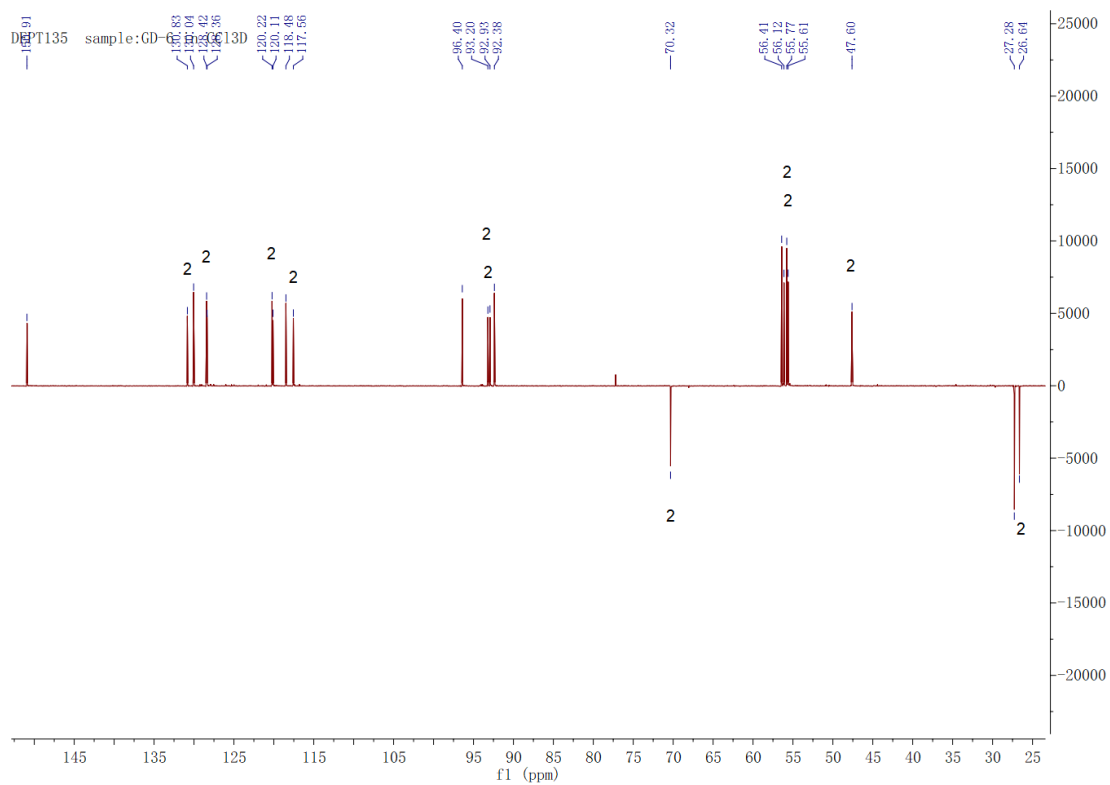

163

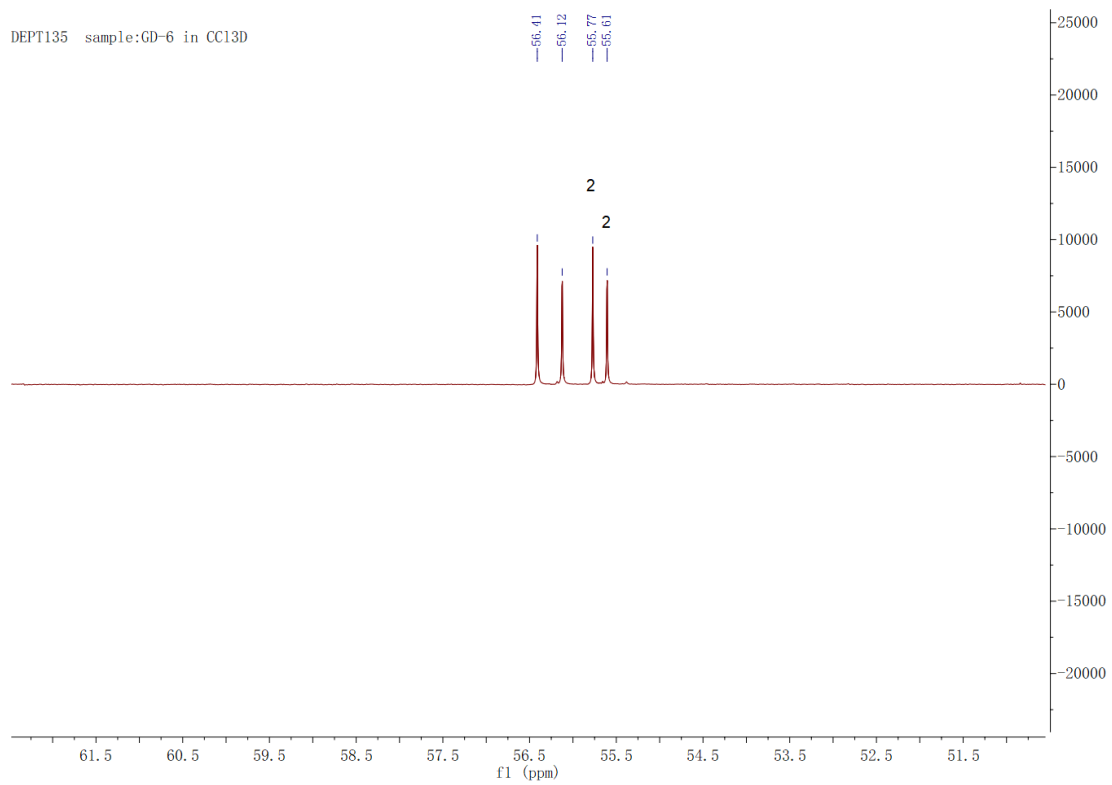

164

165

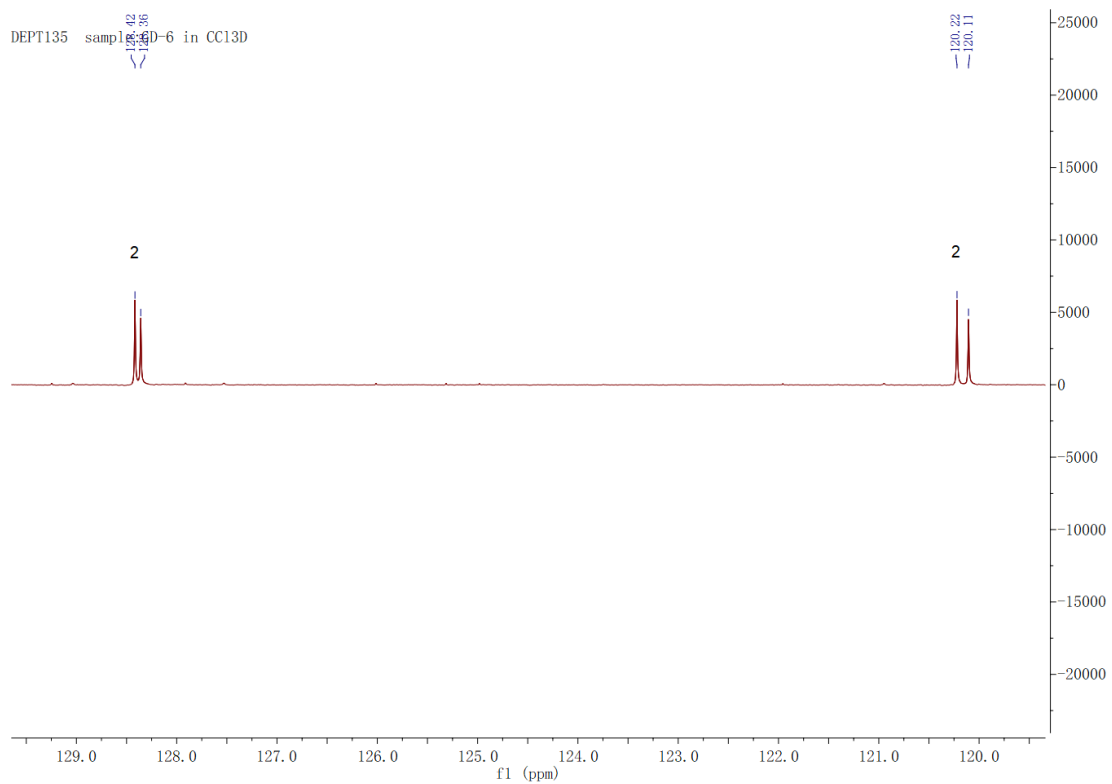

166

167

168 Figure S15. DEPT spectrum of oleracone K (**2**) in CDCl<sub>3</sub>

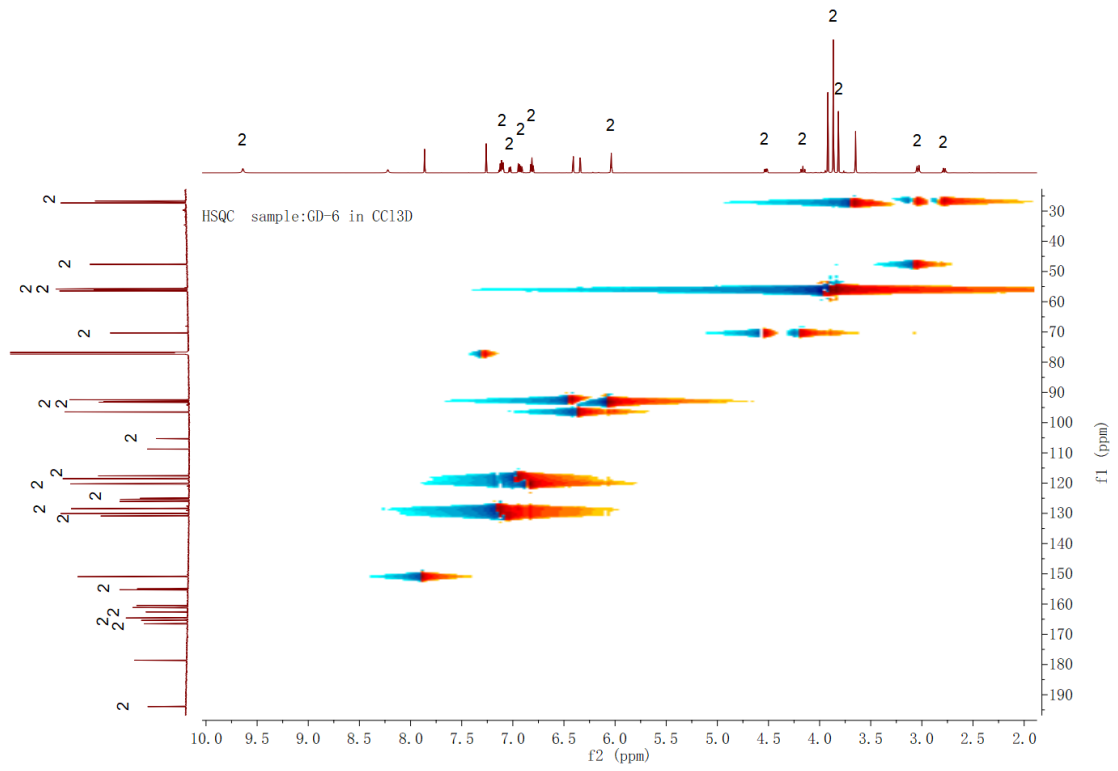

169

170

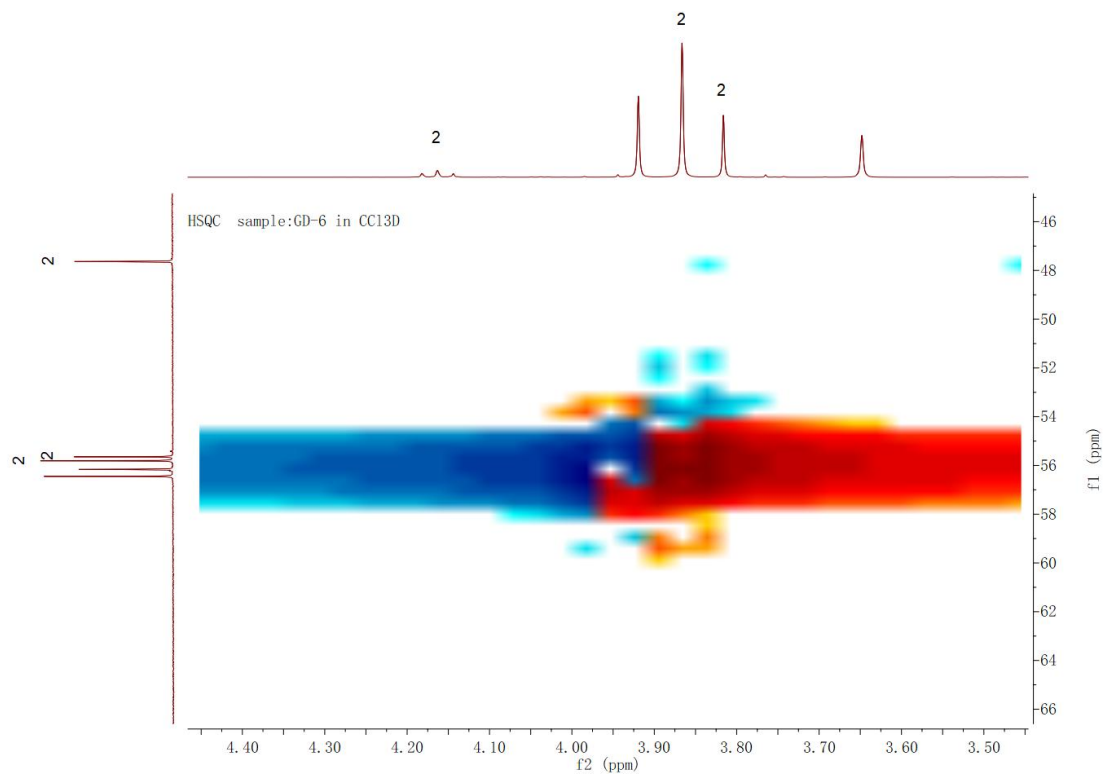

171

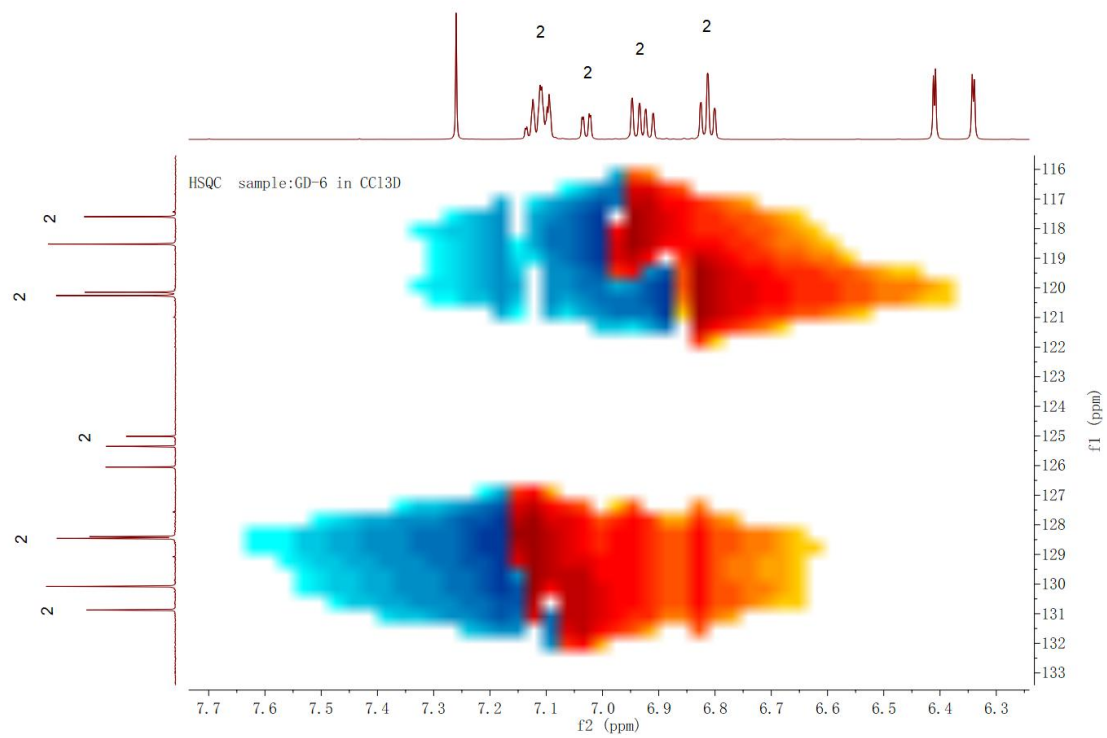

172

173

174 Figure S16. HSQC spectrum of oleracone K (**2**) in CDCl<sub>3</sub>

175

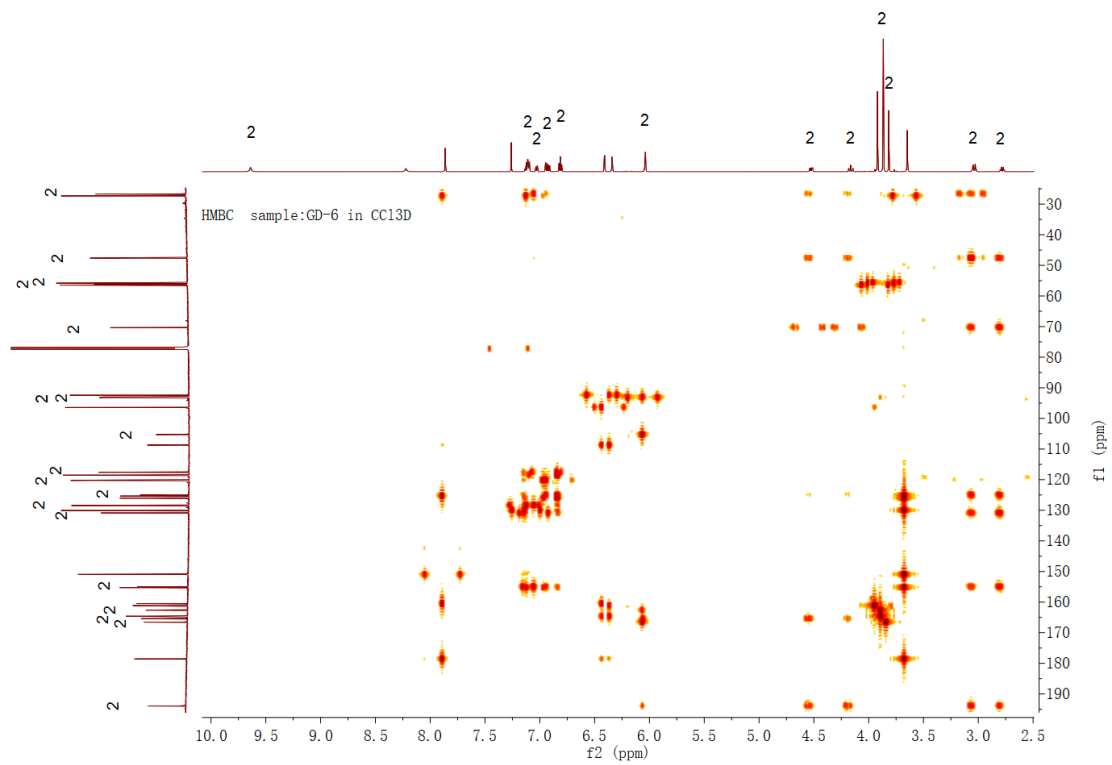

176

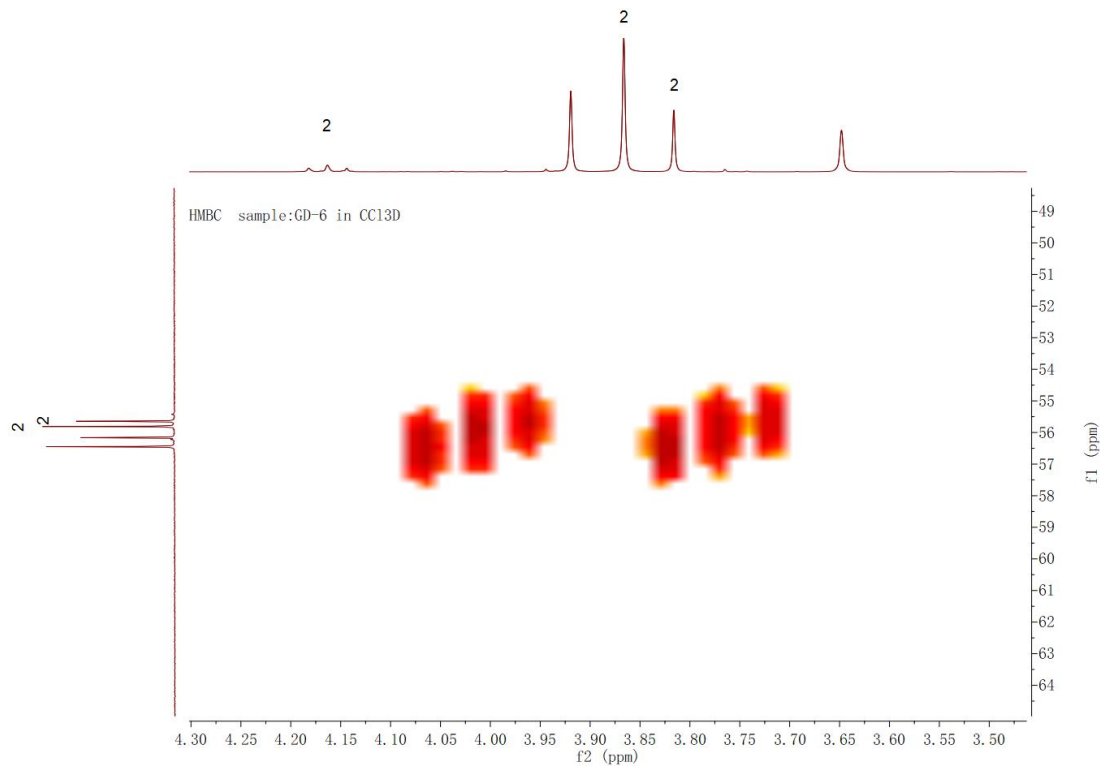

177

178

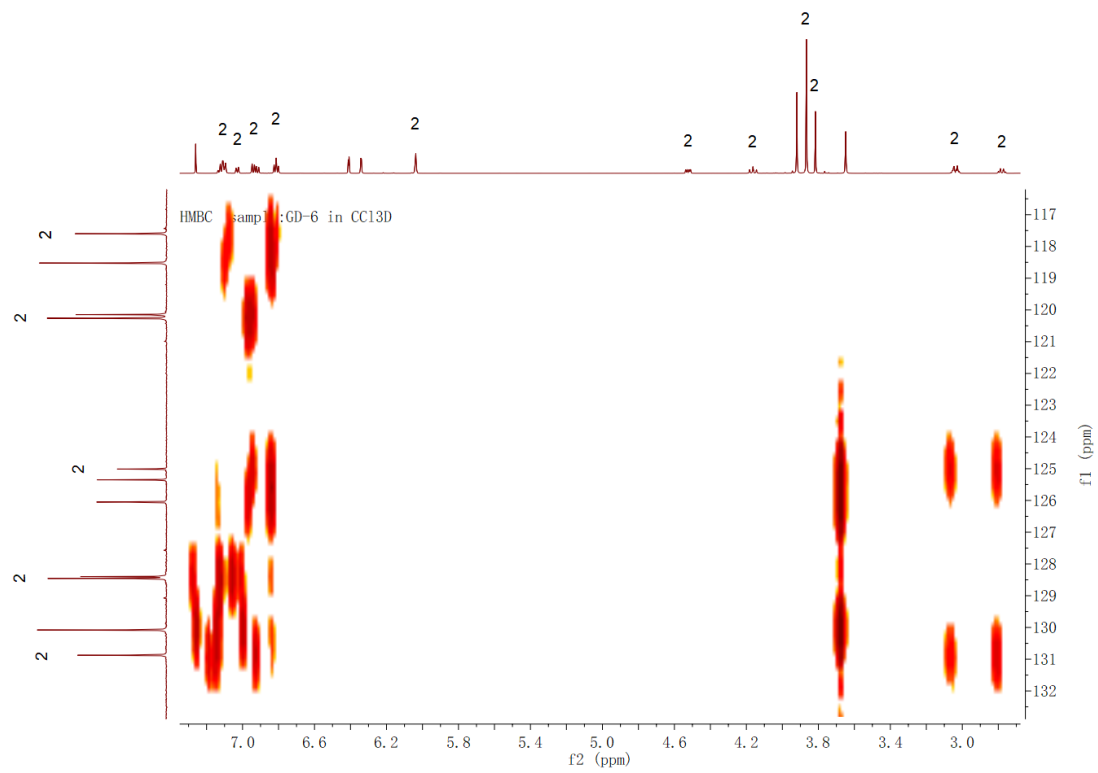

179

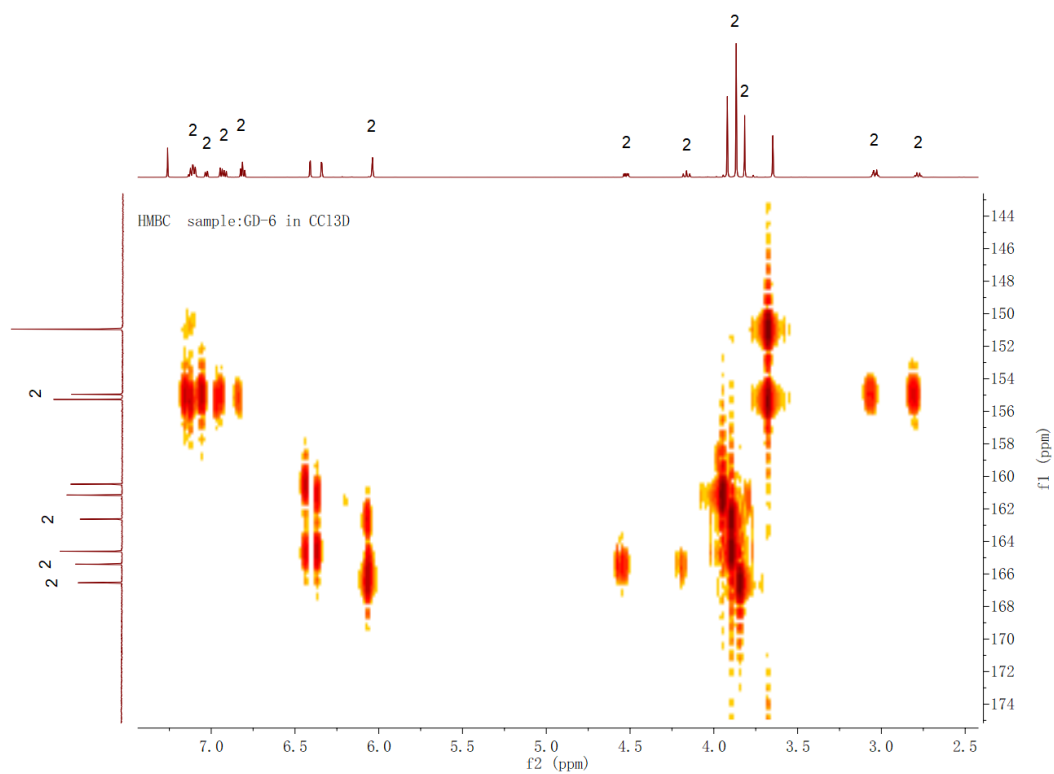

180

181

182 Figure S17. HMBC spectrum of oleracone K (**2**) in CDCl<sub>3</sub>

183

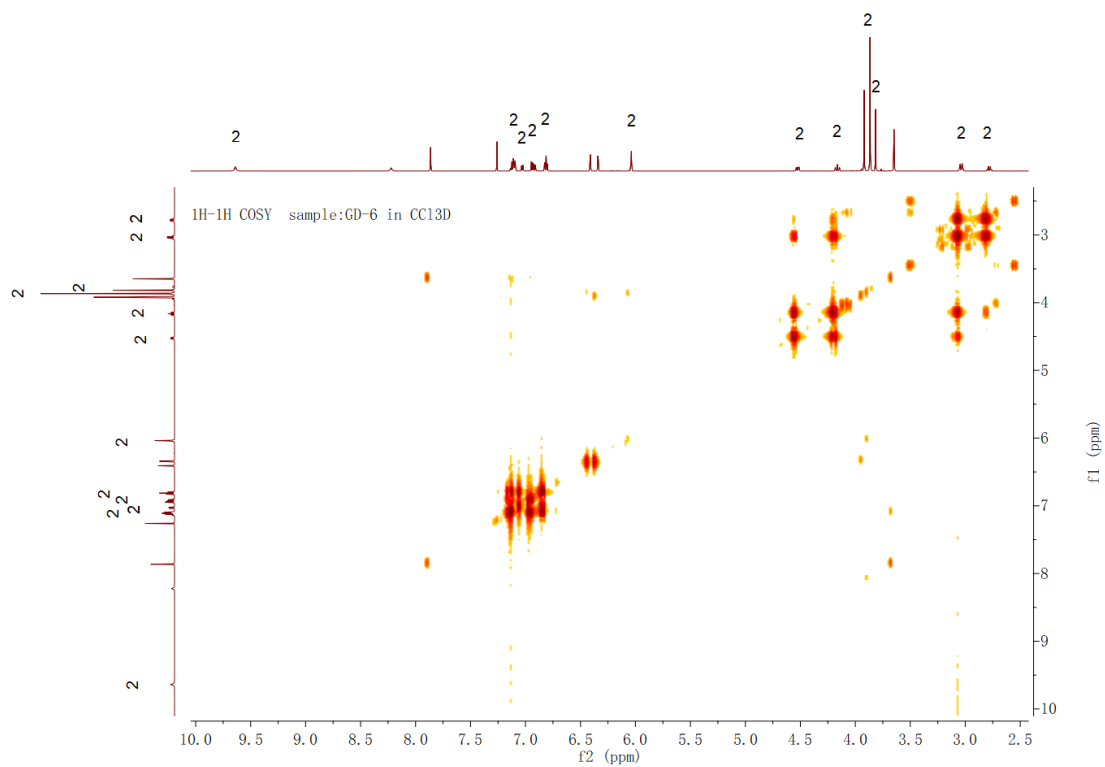

184



185 Figure S18.  $^1\text{H}$ - $^1\text{H}$  COSY spectrum of oleracone K (**2**) in  $\text{CDCl}_3$

186

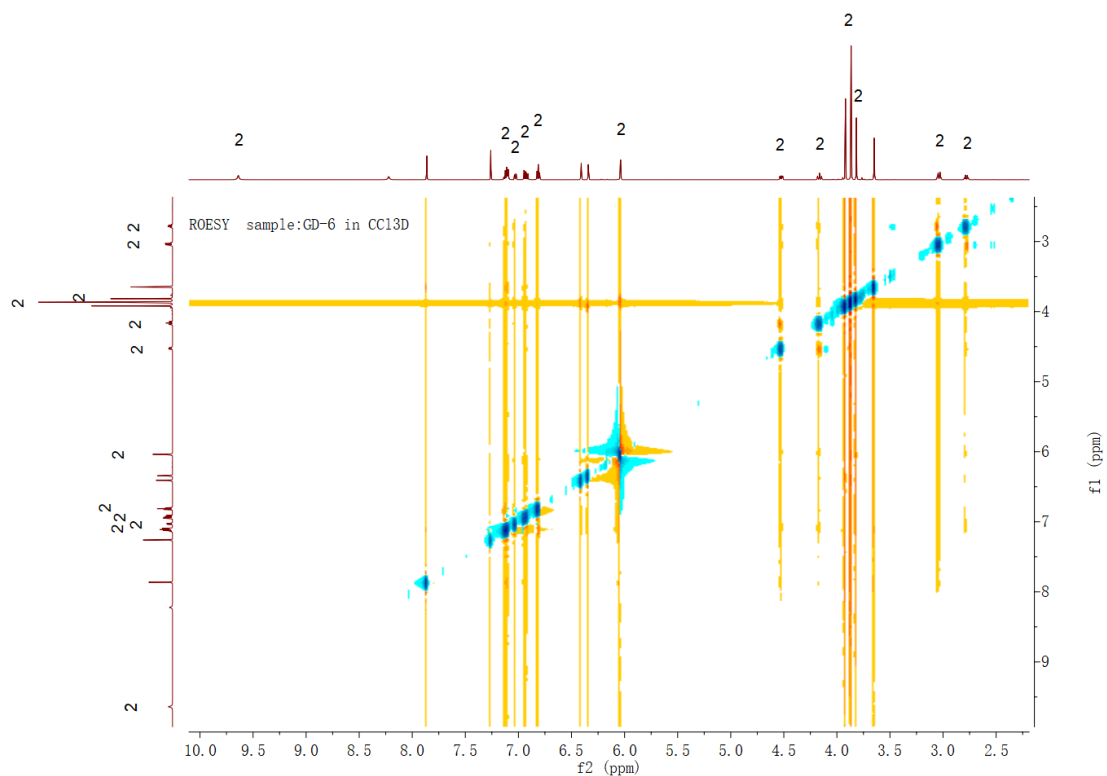

187

188

189 Figure S19. ROESY spectrum of oleracone K (**2**) in  $\text{CDCl}_3$

190

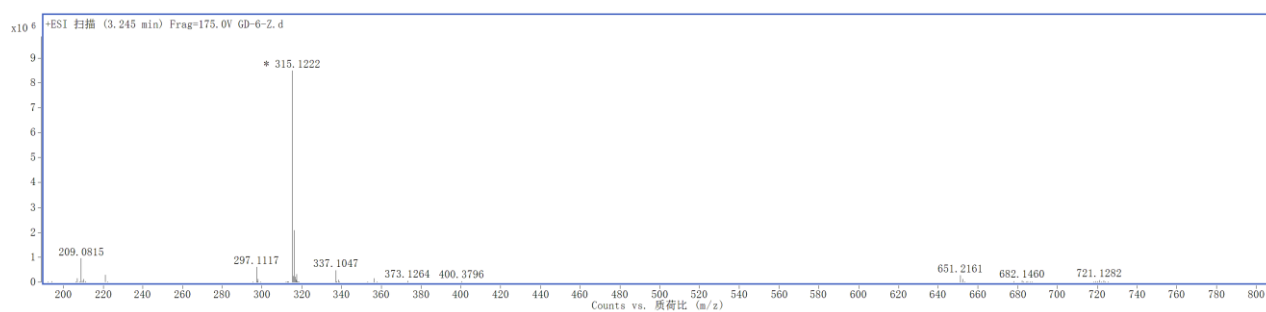

191

192

193 Figure S20. UHPLC-ESI-Q-TOF/MS of oleracone K (**2**)

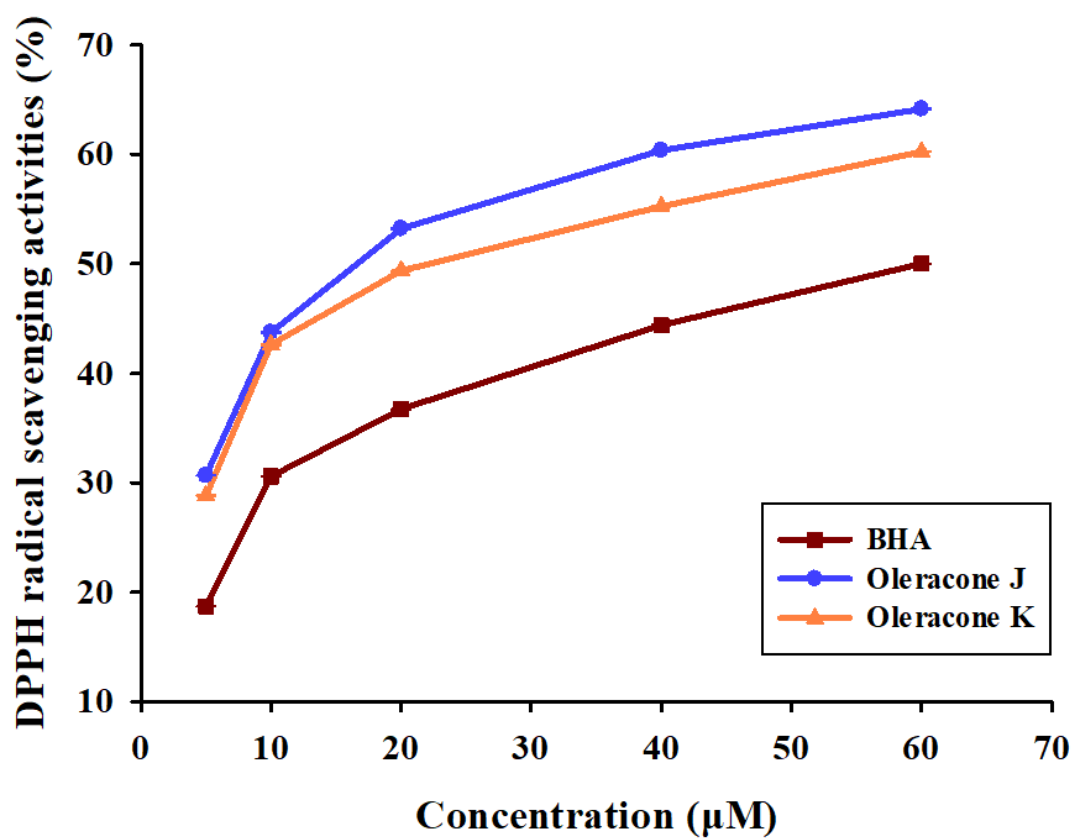

194

195

196 Figure S21. DPPH radical scavenging activities of compounds **1-2** and BHA

197 The values are expressed as the means  $\pm$  SD for  $n = 5$ .

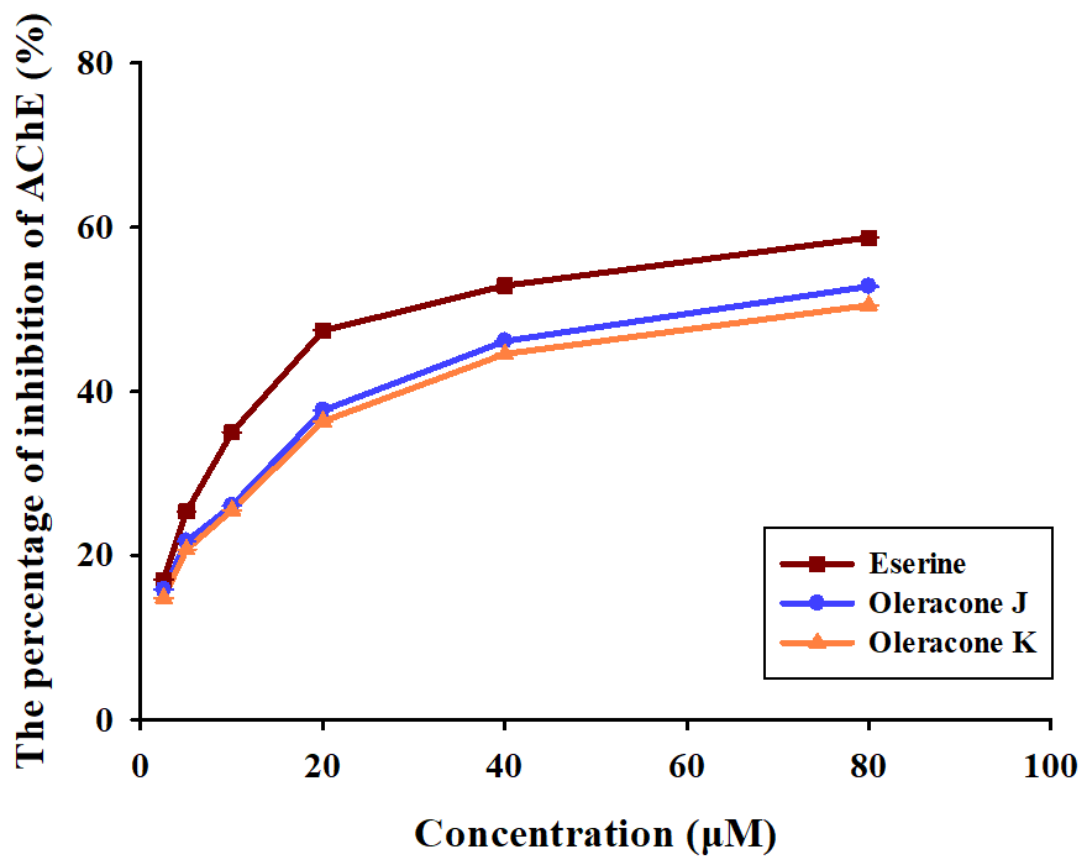

198

199

200 Figure S22. Anticholinesterase effect of compounds 1-2 and Eserine

201 The values are expressed as the means  $\pm$  SD for  $n = 5$ .

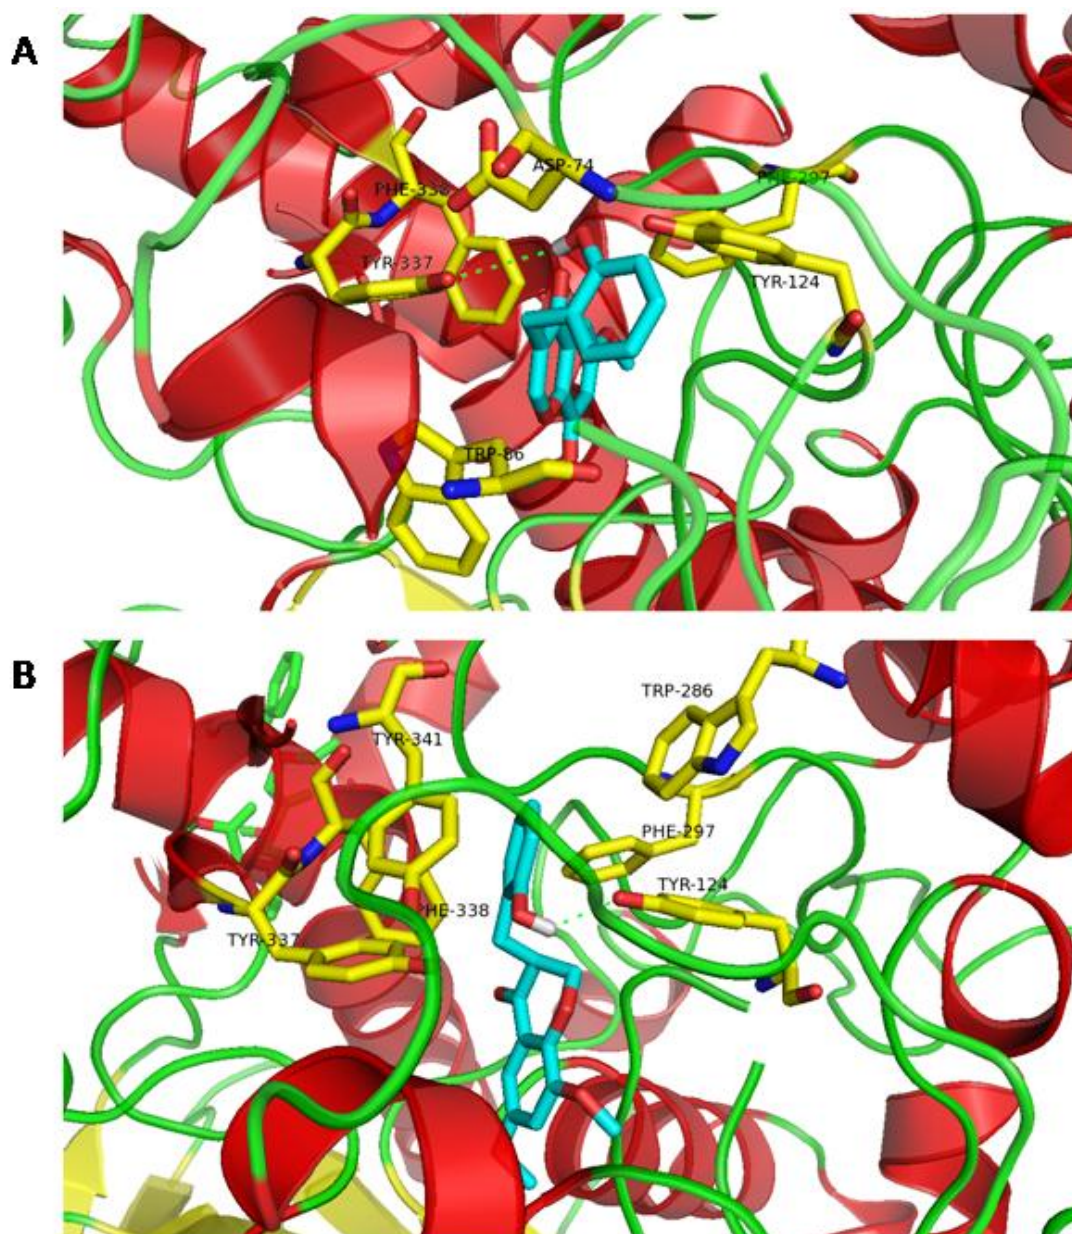

202

203

204 Figure S23. Compounds **1-2** binding mode to AChE

205 (**A**) oleracone J (**B**) oleracone K.

206 Carbons are colored in cyan in the compounds and yellow in the residues of protein.

207 Hydrogen bonds are drawn as green dashes.
